# Supplementary material for: Fuzzy Nonbalanced Hedonic Scale (F-NBHS): A New Method for Treatments of Food Preference Data Collected with Hedonic Scales of Points
Source: Hindawi journal article supplement (doi:10.1155/2020/7945906), 2020-02-11
Supplement: f1 [file 7945906.f1.zip]

Archive with 6 entries (6 files):
- 7945906.f1/Supplementary Material A.docx
- 7945906.f1/Supplementary Material B.docx
- 7945906.f1/Supplementary Material C .docx
- 7945906.f1/Supplementary Material D.xlsx
- 7945906.f1/Supplementary Material E.xlsx
- 7945906.f1/Supplementary Material F.xlsx
