# Supplementary material for: Fuzzy Nonbalanced Hedonic Scale (F-NBHS): A New Method for Treatments of Food Preference Data Collected with Hedonic Scales of Points
Source: Hindawi journal article supplement (doi:10.1155/2020/7945906), 2020-02-11
Supplement: f1 [file 7945906.f1.zip › 7945906.f1/Supplementary Material A.docx]

**Supplementary Material A –** Central values of each category on non-balanced scales with different point numbers.

| Nº de pontos da escala (t) | k = (t+1)/2 | n | Região da escala | Fórmula utilizada | Valor de Sn |
| --- | --- | --- | --- | --- | --- |
| 3 | 2 | -1 | Extrema | k + n | 1,00 |
| 0 | Central | k + n | 2,00 |
| 1 | Extrema | k +n | 3,00 |
| 5 | 3 | -2 | Extrema | k+ n | 1,00 |
| -1 | Intermediária | k-(|n|+(1/k)) | 1,67 |
| 0 | Central | k+ n | 3,00 |
| 1 | Intermediária | k+(|n|+(1/k)) | 4,33 |
| 2 | Extrema | k+n | 5,00 |
| 7 | 4 | -3 | Extrema | k+ n | 1,00 |
| -2 | Intermediária | k-(|n|+(1/k)) | 1,75 |
| -1 | Intermediária | k-(|n|+(1/k)) | 2,75 |
| 0 | Central | k+ n | 4,00 |
| 1 | Intermediária | k+(|n|+(1/k)) | 5,25 |
| 2 | Intermediária | k+(|n|+(1/k)) | 6,25 |
| 3 | Extrema | k+ n | 7,00 |
| 11 | 6 | -5 | Extrema | k+ n | 1,00 |
| -4 | Intermediária | k-(|n|+(1/k)) | 1,83 |
| -3 | Intermediária | k-(|n|+(1/k)) | 2,83 |
| -2 | Intermediária | k-(|n|+(1/k)) | 3,83 |
| -1 | Intermediária | k-(|n|+(1/k)) | 5,17 |
| 0 | Central | k+ n | 6,00 |
| 1 | Intermediária | k+(|n|+(1/k)) | 6,83 |
| 2 | Intermediária | k+(|n|+(1/k)) | 8,17 |
| 3 | Intermediária | k+(|n|+(1/k)) | 9,17 |
| 4 | Intermediária | k+(|n|+(1/k)) | 10,17 |
| 5 | Extrema | k+ n | 11,00 |
| 13 | 7 | -6 | Extrema | k+ n | 1,00 |
| -5 | Intermediária | k-(|n|+(1/k)) | 1,86 |
| -4 | Intermediária | k-(|n|+(1/k)) | 2,86 |
| -3 | Intermediária | k-(|n|+(1/k)) | 3,86 |
| -2 | Intermediária | k-(|n|+(1/k)) | 4,86 |
| -1 | Intermediária | k-(|n|+(1/k)) | 6,17 |
| 0 | Central | k+ n | 7,00 |
| 1 | Intermediária | k+(|n|+(1/k)) | 7,83 |
| 2 | Intermediária | k+(|n|+(1/k)) | 9,14 |
| 3 | Intermediária | k+(|n|+(1/k)) | 10,14 |
| 4 | Intermediária | k+(|n|+(1/k)) | 11,14 |
| 5 | Intermediária | k+(|n|+(1/k)) | 12,14 |
| 6 | Extrema | k+ n | 13,00 |
