# Supplementary material for: Fuzzy Nonbalanced Hedonic Scale (F-NBHS): A New Method for Treatments of Food Preference Data Collected with Hedonic Scales of Points
Source: Hindawi journal article supplement (doi:10.1155/2020/7945906), 2020-02-11
Supplement: f1 [file 7945906.f1.zip › 7945906.f1/Supplementary Material B.docx]

**Supplementary Material B** - Fuzzy triangular numbers of non-balanced Fuzzy scales proposed with 3,5,7,11 and 13 points.

| Nº de pontos da escala (t) | n | Ponto inicial da categoria | Ponto central da categoria | Ponto final da categoria | Valor defuzzifcado |
| --- | --- | --- | --- | --- | --- |
| 3 | -1 | 1,00 | 1,00 | 1 | 1,00 |
| 0 | 1,00 | 2,00 | 3,00 | 2,00 |
| 1 | 2,00 | 3,00 | 3,00 | 2,75 |
| 5 | -2 | 1,00 | 1,00 | 1,67 | 1,17 |
| -1 | 1,00 | 1,67 | 3,00 | 1,83 |
| 0 | 1,67 | 3,00 | 4,33 | 3,00 |
| 1 | 3,00 | 4,33 | 5,00 | 4,17 |
| 2 | 4,33 | 5,00 | 5,00 | 4,83 |
| 7 | -3 | 1,00 | 1,00 | 1,75 | 1,19 |
| -2 | 1,00 | 1,75 | 4,00 | 2,13 |
| -1 | 1,00 | 2,75 | 4,00 | 2,63 |
| 0 | 2,75 | 4,00 | 5,25 | 4,00 |
| 1 | 4,00 | 5,25 | 7,00 | 5,38 |
| 2 | 4,00 | 6,25 | 7,00 | 5,88 |
| 3 | 6,25 | 7,00 | 7,00 | 6,81 |
| 11 | -5 | 1,00 | 1,00 | 1,83 | 1,21 |
| -4 | 1,00 | 1,83 | 3,83 | 2,13 |
| -3 | 1,00 | 2,83 | 5,20 | 2,97 |
| -2 | 1,83 | 3,83 | 6,00 | 3,88 |
| -1 | 2,83 | 5,20 | 6,00 | 4,81 |
| 0 | 5,20 | 6,00 | 6,80 | 6,00 |
| 1 | 6,00 | 6,80 | 9,17 | 7,19 |
| 2 | 6,00 | 8,17 | 10,17 | 8,13 |
| 3 | 6,80 | 9,17 | 11,00 | 9,03 |
| 4 | 8,17 | 10,17 | 11,00 | 9,88 |
| 5 | 10,17 | 11,00 | 11,00 | 10,79 |
| 13 | -6 | 1,00 | 1,00 | 1,86 | 1,21 |
| -5 | 1,00 | 1,86 | 3,86 | 2,14 |
| -4 | 1,00 | 2,86 | 4,86 | 2,89 |
| -3 | 1,86 | 3,86 | 6,17 | 3,93 |
| -2 | 2,86 | 4,86 | 7,00 | 4,89 |
| -1 | 3,86 | 6,17 | 7,00 | 5,80 |
| 0 | 6,17 | 7,00 | 7,83 | 7,00 |
| 1 | 7,00 | 7,83 | 10,14 | 8,20 |
| 2 | 7,00 | 9,14 | 11,14 | 9,11 |
| 3 | 7,83 | 10,14 | 12,14 | 10,07 |
| 4 | 9,14 | 11,14 | 13,00 | 11,11 |
| 5 | 10,14 | 12,14 | 13,00 | 11,86 |
| 6 | 12,14 | 13,00 | 13,00 | 12,79 |
