# Supplementary material for: Fuzzy Nonbalanced Hedonic Scale (F-NBHS): A New Method for Treatments of Food Preference Data Collected with Hedonic Scales of Points
Source: Hindawi journal article supplement (doi:10.1155/2020/7945906), 2020-02-11
Supplement: f1 [file 7945906.f1.zip › 7945906.f1/Supplementary Material C .docx]

**Supplementary Material C** - Graphical representation of triangular fuzzy numbers according to the proposed methodology of non-balanced Fuzzy scales with 3,5,7,11 and 13 points.

Figura 1 - Representação gráfica da escalas Fuzzy não balanceada propostas de 3 pontos.

**
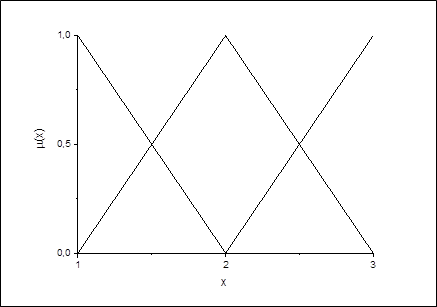
**

Figura 2 - Representação gráfica da escalas Fuzzy não balanceada propostas de 5 pontos.

**
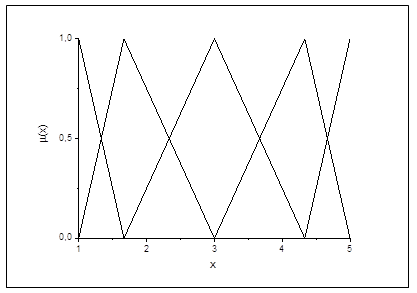
**

Figura 3 - Representação gráfica da escalas Fuzzy não balanceada propostas de 7 pontos.

**
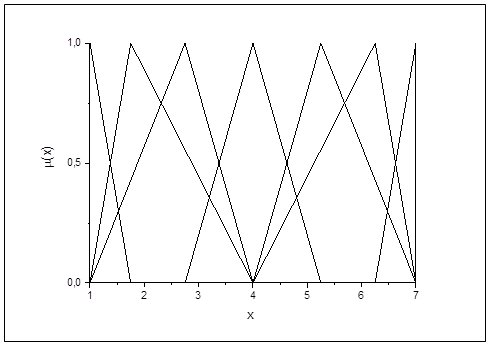
**

Figura 4 - Representação gráfica da escalas Fuzzy não balanceada propostas de 11 pontos.


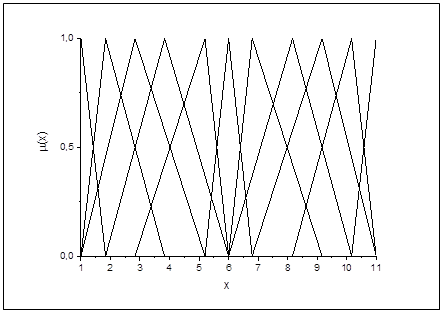


Figura 4 - Representação gráfica da escalas Fuzzy não balanceada propostas de 13 pontos.

**
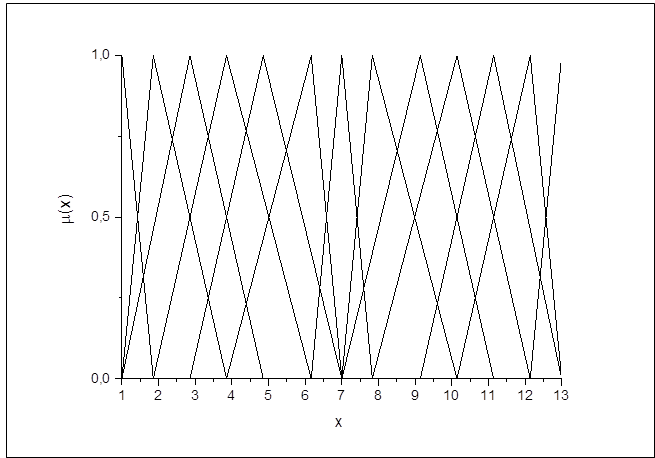
**
