# Supplementary material for: Fuzzy Nonbalanced Hedonic Scale (F-NBHS): A New Method for Treatments of Food Preference Data Collected with Hedonic Scales of Points
Source: Hindawi journal article supplement (doi:10.1155/2020/7945906), 2020-02-11
Supplement: f1 [file 7945906.f1.zip › 7945906.f1/Supplementary Material D.xlsx]

## Sheet: Personal Data
n=119	Sex	Age	Country	District
Student 1	2	19	Portugal	Braga
Student 2	2	19	Portugal	Braga
Student 3	1	19	Portugal	Braga
Student 4	1	19	Portugal	Braga
Student 5	2	19	Portugal	Braga
Student 6	2	19	Portugal	Braga
Student 7	2	18	Portugal	Braga
Student 8	1	18	Portugal	Açores
Student 9	2	18	Portugal	Braga
Student 10	2	18	Portugal	Braga
Student 11	1	18	Portugal	Aveiro
Student 12	2	18	Portugal	Viana do Castelo
Student 13	1	18	Portugal	Braga
Student 14	1	18	Portugal	Braga
Student 15	1	18	Portugal	Braga
Student 16	1	18	Portugal	Braga
Student 17	1	18	Portugal	Braga
Student 18	2	18	Portugal	Braga
Student 19	1	18	Portugal	Porto
Student 20	2	19	Portugal	Braga
Student 21	2	18	Portugal	Porto
Student 22	1	19	Portugal	Braga
Student 23	2	18	Portugal	Aveiro
Student 24	2	18	Portugal	Braga
Student 25	2	18	Portugal	Braga
Student 26	2	18	Portugal	Bragança
Student 27	2	18	Portugal	Braga
Student 28	2	18	Portugal	Braga
Student 29	2	18	Portugal	Braga
Student 30	2	19	Brasil	Ceará
Student 31	2	18	Portugal	Braga
Student 32	1	34	Portugal	Braga
Student 33	1	18	Cabo Verde	-
Student 34	1	18	Portugal	Braga
Student 35	1	32	Portugal	Braga
Student 36	2	20	Portugal	Braga
Student 37	2	22	Portugal	Braga
Student 38	2	23	Portugal	Braga
Student 39	2	19	Portugal	Braga
Student 40	2	20	Portugal	Viana do Castelo
Student 41	2	18	Portugal	Braga
Student 42	2	19	Portugal	Braga
Student 43	2	19	Portugal	Braga
Student 44	2	20	Portugal	Braga
Student 45	2	19	Portugal	Viana do Castelo
Student 46	2	19	Portugal	Braga
Student 47	2	19	Portugal	Viana do Castelo
Student 48	2	19	Portugal	Braga
Student 49	1	19	Portugal	Braga
Student 50	2	19	Portugal	Braga
Student 51	2	19	Portugal	Braga
Student 52	2	19	Portugal	Braga
Student 53	1	19	Portugal	Braga
Student 54	1	21	Portugal	Braga
Student 55	1	21	Angola	-
Student 56	1	22	Angola	Luanda
Student 57	1	20	Portugal	Braga
Student 58	2	20	Portugal	Braga
Student 59	2	20	Portugal	Porto
Student 60	2	20	Portugal	Braga
Student 61	2	21	Portugal	Porto
Student 62	2	20	Portugal	Braga
Student 63	1	20	Portugal	Braga
Student 64	2	20	Portugal	Viana do Castelo
Student 65	2	21	Portugal	Braga
Student 66	2	20	Portugal	Braga
Student 67	2	20	Portugal	Porto
Student 68	1	21	Portugal	Porto
Student 69	2	20	Venezuela
Student 70	2	19	Portugal	Braga
Student 71	2	20	Portugal	Braga
Student 72	2	20	Portugal	Porto
Student 73	2	20	Portugal	Viana do Castelo
Student 74	2	20	Portugal	Porto
Student 75	1	20	Portugal	Braga
Student 76	1	24	Portugal	Vila Real
Student 77	2	20	Portugal	Braga
Student 78	1	20	Portugal	Braga
Student 79	2	20	Portugal	Porto
Student 80	1	20	Portugal	Braga
Student 81	1	25	Portugal	Braga
Student 82	2		Portugal	Braga
Student 83	1	21	Portugal	Braga
Student 84	1	22	Portugal	Braga
Student 85	2	22	Portugal	Porto
Student 86	2	21	Portugal	Braga
Student 87	1	21	Portugal	Braga
Student 88	1	21	Portugal	Braga
Student 89	1	21	Portugal	Braga
Student 90	2	21	Portugal	Braga
Student 91	1	21	Portugal	Vila Real
Student 92	1	20	Portugal	Porto
Student 93	2	21	Portugal	Porto
Student 94	2	23	Brasil	São Paulo
Student 95	2	20	Portugal	Braga
Student 96	2	21	Portugal	Braga
Student 97	2	21	Portugal	Porto
Student 98	2	21	Portugal	Porto
Student 99	1	21	Portugal	Braga
Student 100	1	21	Portugal	Viana do Castelo
Student 101	2	21	Portugal	Porto
Student 102	1	22	Portugal	Porto
Student 103	2	21	Portugal	Viana do Castelo
Student 104	2	21	Portugal	Porto
Student 105	2	22	Portugal	Braga
Student 106	2		Portugal	-
Student 107	1	22	Portugal	Braga
Student 108	1	21	Portugal	Braga
Student 109	2	21	Portugal	Braga
Student 110	2	22	Portugal	Braga
Student 111	2	22	Portugal	Braga
Student 112	1	22	Portugal	Porto
Student 113	1	22	Portugal	Braga
Student 114	1	22	Cabo Verde	Santiago
Student 115	2	22	Portugal	Braga
Student 116	1	22	Portugal	Porto
Student 117	2	22	Portugal	Porto
Student 118	2	23	Portugal	Braga
Student 119	1	22	Portugal	Braga

## Sheet: Legumes
	Legumes
	Friar Beans	Lentils	Black Beans	White Beans	Chickpeas
Student 1	6	NC	9	7	5
Student 2	8	NC	8	2	7
Student 3	5	5	5	5	5
Student 4	5	5	5	5	5
Student 5	4	6	9	6	4
Student 6	8	1	9	9	4
Student 7	2	2	2	2	2
Student 8	5	4	6	6	4
Student 9	6	4	8	7	5
Student 10	8	8	2	9	9
Student 11	5	NC	4	4	6
Student 12	7	5	8	8	8
Student 13	6	2	8	7	2
Student 14	5	3	4	5	7
Student 15	8	5	6	8	6
Student 16	7	1	8	1	1
Student 17	4	4	2	2	2
Student 18	2	2	2	2	2
Student 19	3	4	6	7	4
Student 20	6	2	2	5	5
Student 21	2	2	2	2	2
Student 22	5	3	6	3	4
Student 23	1	1	1	1	1
Student 24	4	3	3	3	2
Student 25	1	1	1	1	1
Student 26	7	7	7	7	7
Student 27	7	5	7	4	7
Student 28	3	3	5	2	2
Student 29	8	NC	8	8	8
Student 30	5	5	6	6	2
Student 31	5	NC	4	4	5
Student 32	6	5	8	8	8
Student 33	7	7	7	7	6
Student 34	9	9	9	9	9
Student 35	7	2	5	5	6
Student 36	8	2	8	7	6
Student 37	1	1	1	1	1
Student 38	8	8	5	5	8
Student 39	8	8	8	8	2
Student 40	5	NC	7	5	4
Student 41	7	5	6	6	8
Student 42	8	7	8	8	8
Student 43	1	1	1	1	2
Student 44	9	9	9	9	9
Student 45	7	5	9	5	7
Student 46	6	4	5	6	3
Student 47	9	9	9	9	9
Student 48	8	NC	8	8	8
Student 49	4	3	8	6	1
Student 50	8	NC	8	2	7
Student 51	2	2	2	2	3
Student 52	4	6	9	6	4
Student 53	5	5	5	5	5
Student 54	6	NC	7	5	NC
Student 55	6	6	7	7	7
Student 56	6	4	7	7	6
Student 57	9	8	9	8	6
Student 58	9	5	9	9	8
Student 59	9	1	9	7	8
Student 60	8	8	8	8	8
Student 61	6	1	6	6	6
Student 62	7	4	8	7	7
Student 63	5	5	3	5	9
Student 64	NC	NC	1	NC	NC
Student 65	7	4	9	8	7
Student 66	6	3	8	6	7
Student 67	5	3	9	8	6
Student 68	4	4	4	4	5
Student 69	6	1	2	2	1
Student 70	7	5	9	7	7
Student 71	1	1	1	1	1
Student 72	6	5	1	5	5
Student 73	7	7	7	5	8
Student 74	8	1	8	8	8
Student 75	8	7	7	7	7
Student 76	8	8	8	8	8
Student 77	7	6	8	4	7
Student 78	7	8	7	7	6
Student 79	7	7	8	7	8
Student 80	5	1	7	7	5
Student 81	3	NC	3	3	3
Student 82	8	4	8	6	8
Student 83	2	2	2	2	2
Student 84	6	5	6	6	5
Student 85	1	5	8	8	6
Student 86	9	3	8	5	8
Student 87	4	3	8	6	1
Student 88	8	5	9	7	4
Student 89	7	6	9	8	7
Student 90	7	6	7	7	7
Student 91	NC	NC	NC	NC	NC
Student 92	7	7	9	9	8
Student 93	6	2	4	4	5
Student 94	5	8	7	5	8
Student 95	1	1	1	1	1
Student 96	4	1	8	8	4
Student 97	7	5	7	6	7
Student 98	7	1	8	7	1
Student 99	8	7	9	9	9
Student 100	6	4	6	6	6
Student 101	2	1	2	2	3
Student 102	4	8	8	8	1
Student 103	8	6	9	6	9
Student 104	7	5	8	7	6
Student 105	8	NC	8	7	8
Student 106	8	NC	8	8	8
Student 107	6	6	8	5	7
Student 108	2	2	2	2	2
Student 109	7	nc	8	7	7
Student 110	8	3	9	8	8
Student 111	7	5	7	6	7
Student 112	9	9	9	9	9
Student 113	4	6	7	4	2
Student 114	8	NC	8	8	8
Student 115	8	1	8	8	8
Student 116	9	1	9	6	8
Student 117	1	1	1	1	1
Student 118	3	4	4	1	2
Student 119	6	3	6	6	7

## Sheet: Fish
	Fish
	Hake fillets	Shrimp	Sardines	Cod	Tentacles of Pota	Ray	Salmon	Tuna
Student 1	5	9	5	7	NC	NC	7	7
Student 2	6	8	7	8	3	3	9	8
Student 3	6	8	8	9	8	NC	8	8
Student 4	6	7	7	7	7	4	8	8
Student 5	7	9	7	7	8	3	9	8
Student 6	4	4	3	3	7	2	8	8
Student 7	6	8	5	1	2	2	8	1
Student 8	8	9	8	6	8	6	8	8
Student 9	8	8	6	6	7	3	8	7
Student 10	8	8	4	4	8	1	5	6
Student 11	4	8	6	8	9	5	1	8
Student 12	8	2	5	8	2	8	8	8
Student 13	8	8	8	8	8	NC	8	8
Student 14	7	3	6	8	1	1	9	8
Student 15	7	8	6	7	6	NC	7	6
Student 16	7	3	1	2	1	1	8	5
Student 17	9	9	9	9	9	4	9	9
Student 18	6	9	5	6	1	2	5	4
Student 19	6	7	4	7	3	3	7	5
Student 20	6	8	5	7	2	2	4	6
Student 21	8	8	8	7	6	6	9	9
Student 22	8	9	4	8	8	8	8	4
Student 23	7	7	4	8	8	5	8	5
Student 24	7	8	6	6	5	5	1	7
Student 25	8	9	7	2	8	NC	8	8
Student 26	7	6	4	6	4	1	9	6
Student 27	6	7	4	6	8	3	7	8
Student 28	8	8	6	7	2	1	9	9
Student 29	6	8	6	8	7	4	8	8
Student 30	2	2	3	6	3	3	8	7
Student 31	7	9	6	8	NC	6	9	2
Student 32	7	7	7	8	8	9	8	8
Student 33	8	6	7	4	3	3	7	8
Student 34	9	9	9	9	9	9	4	9
Student 35	8	9	6	8	5	7	8	8
Student 36	6	9	6	7	8	NC	7	8
Student 37	7	9	7	7	8	1	8	8
Student 38	9	9	5	9	1	1	9	9
Student 39	8	9	8	8	8	6	9	9
Student 40	5	7	5	6	NC	5	7	7
Student 41	7	6	3	8	4	5	6	7
Student 42	8	8	8	7	8	5	8	8
Student 43	6	8	8	9	1	8	8	6
Student 44	9	9	9	9	1	1	9	9
Student 45	8	7	9	8	8	5	5	8
Student 46	9	1	8	6	1	1	8	9
Student 47	8	8	4	9	9	4	9	9
Student 48	8	9	6	4	5	2	7	8
Student 49	8	3	3	4	2	1	2	2
Student 50	6	8	7	8	3	3	9	8
Student 51	8	9	8	8	2	2	7	7
Student 52	7	9	7	7	8	3	9	8
Student 53	6	8	8	9	8	NC	8	8
Student 54	6	7	4	8	7	2	4	6
Student 55	7	7	7	8	7	5	8	6
Student 56	NR	NR	6	7	2	6	5	6
Student 57	8	9	8	7	7	5	6	8
Student 58	8	8	3	6	2	2	8	8
Student 59	6	9	6	8	7	1	8	8
Student 60	8	9	8	8	8	6	9	9
Student 61	9	8	4	9	6	2	2	9
Student 62	8	8	8	7	2	3	4	8
Student 63	5	9	3	5	2	2	5	7
Student 64	1	6	1	6	NC	6	6	1
Student 65	9	9	5	9	8	6	6	6
Student 66	6	8	3	6	7	4	5	4
Student 67	5	9	1	9	1	1	5	9
Student 68	6	6	4	7	1	NC	7	7
Student 69	9	9	7	8	9	1	9	9
Student 70	9	9	7	9	8	NC	9	9
Student 71	7	1	1	8	1	1	8	8
Student 72	8	1	1	4	7	1	7	9
Student 73	7	8	6	7	7	2	6	7
Student 74	8	9	7	9	7	7	9	9
Student 75	8	7	7	7	7	7	7	7
Student 76	8	8	6	8	8	8	8	8
Student 77	7	8	7	7	7	7	7	6
Student 78	7	8	8	6	3	3	9	9
Student 79	7	7	7	8	8	NC	8	8
Student 80	7	9	8	6	1	1	6	6
Student 81	6	6	7	7	NC	NC	6	7
Student 82	7	8	7	8	6	4	8	7
Student 83	7	9	7	7	7	6	6	8
Student 84	8	7	8	7	6	8	9	8
Student 85	7	7	7	8	8	5	5	4
Student 86	8	8	1	3	4	4	9	9
Student 87	6	9	6	6	3	2	8	8
Student 88	8	8	8	8	8	7	7	8
Student 89	6	5	5	7	5	3	9	7
Student 90	7	8	6	7	7	6	7	7
Student 91	3	8	7	6	7	6	7	3
Student 92	7	3	8	8	9	9	9	9
Student 93	7	8	7	7	4	4	7	7
Student 94	8	6	7	7	4	NC	8	7
Student 95	8	2	1	1	1	1	8	1
Student 96	7	6	3	4	2	1	8	3
Student 97	7	9	7	5	7	4	8	7
Student 98	6	7	7	8	3	1	8	7
Student 99	7	9	9	9	9	2	9	9
Student 100	7	8	6	7	8	4	8	7
Student 101	6	8	3	3	1	1	7	9
Student 102	9	9	9	9	9	9	9	9
Student 103	9	9	8	9	9	NC	9	9
Student 104	9	9	9	9	8	5	9	9
Student 105	7	9	8	9	9	8	7	7
Student 106	6	7	7	6	6	4	8	8
Student 107	6	4	6	7	3	4	8	2
Student 108	7	8	8	8	8	5	8	4
Student 109	8	8	7	7	1	1	8	8
Student 110	8	9	7	9	6	3	9	8
Student 111	8	8	6	8	6	5	8	8
Student 112	9	9	9	9	9	9	9	9
Student 113	8	2	3	7	7	3	7	7
Student 114	1	7	7	8	3	1	8	8
Student 115	6	9	8	8	8	5	5	6
Student 116	7	9	7	1	1	1	9	9
Student 117	9	1	9	9	1	1	1	1
Student 118	7	7	2	5	4	2	9	8
Student 119	8	9	6	6	3	3	8	9

## Sheet: Vegetables
	Vegetables
	Cucumber	Radish	Asparagus	Cauliflower	Broccoli	Potato	Onion	Carrot	Watercress	Kale	Eggplant	Tomato	Beetroot	Pepper
Student 1	7	NC	9	5	3	8	9	9	NC	7	NC	8	NC	7
Student 2	7	2	3	2	7	7	2	7	3	8	4	8	2	6
Student 3	4	5	5	5	6	9	1	5	5	6	7	1	7	7
Student 4	8	5	5	5	5	7	7	7	5	6	5	7	5	5
Student 5	7	4	4	6	2	8	8	9	6	7	7	8	1	7
Student 6	7	2	2	1	1	8	5	7	3	3	1	8	2	2
Student 7	2	2	2	2	2	6	1	8	2	2	2	2	2	2
Student 8	2	5	4	3	2	7	2	4	NC	3	3	1	NC	3
Student 9	1	1	7	1	1	8	1	2	9	5	1	7	1	1
Student 10	1	1	1	7	7	7	1	8	7	8	7	1	1	8
Student 11	6	5	4	3	8	8	8	6	5	7	3	7	3	8
Student 12	2	4	5	8	8	7	6	9	6	7	5	7	5	5
Student 13	9	2	7	7	8	6	7	8	6	7	4	7	2	7
Student 14	3	3	3	3	3	9	1	5	3	5	3	3	3	3
Student 15	6	NC	NC	6	4	7	6	6	NC	4	NC	7	NC	6
Student 16	7	5	8	8	8	6	4	6	5	4	6	5	6	4
Student 17	5	NC	3	3	3	7	9	5	NC	2	Nc	5	5	5
Student 18	2	NC	2	2	2	7	2	5	NC	2	2	2	2	4
Student 19	6	4	4	4	3	7	6	7	6	6	4	7	4	3
Student 20	6	4	8	8	8	8	6	7	4	8	6	8	2	7
Student 21	2	2	2	2	2	3	2	3	2	2	2	2	2	2
Student 22	7	5	5	5	6	7	7	7	4	4	3	1	5	7
Student 23	NR	2	6	4	3	7	7	7	7	7	4	2	1	7
Student 24	2	4	4	4	4	8	6	8	5	6	4	5	4	3
Student 25	7	NC	2	2	2	8	2	2	2	2	2	8	2	6
Student 26	7	6	6	7	7	7	5	6	6	6	6	7	5	6
Student 27	8	5	5	7	7	4	7	8	5	6	5	9	5	8
Student 28	4	3	3	3	7	9	7	9	7	4	4	9	3	3
Student 29	8	NC	NC	6	8	7	6	8	NC	6	7	8	NC	7
Student 30	4	4	4	6	6	8	8	8	4	8	8	4	5	6
Student 31	8	4	6	6	7	8	8	8	5	8	4	8	4	8
Student 32	6	6	7	7	7	8	6	9	7	8	6	6	6	7
Student 33	7	6	5	5	5	7	6	5	5	8	5	7	5	6
Student 34	9	3	3	3	3	3	3	3	3	3	3	3	4	4
Student 35	6	2	2	5	4	7	9	8	2	6	1	8	1	9
Student 36	6	NC	6	2	6	7	7	7	5	7	NC	7	NC	6
Student 37	1	1	1	1	1	9	1	6	1	1	1	1	1	1
Student 38	9	9	9	9	9	9	9	9	9	9	9	9	9	9
Student 39	9	9	9	9	9	9	9	9	9	9	9	9	8	9
Student 40	4	NC	NC	5	5	6	8	8	5	6	5	8	NC	8
Student 41	5	5	7	5	5	7	5	6	3	7	4	7	1	5
Student 42	4	4	8	7	7	7	7	7	7	7	5	2	7	9
Student 43	1	3	NC	NC	3	7	6	8	NC	6	4	8	7	1
Student 44	9	1	5	1	6	9	9	9	9	4	9	9	9	9
Student 45	5	NC	5	5	8	7	8	9	9	9	6	9	8	8
Student 46	1	5	1	6	6	9	8	8	5	8	7	1	1	1
Student 47	6	6	8	8	9	8	9	9	9	9	9	9	9	9
Student 48	7	7	5	4	2	8	4	8	6	5	7	9	7	7
Student 49	7	4	2	2	2	8	7	6	2	2	2	6	2	7
Student 50	7	2	3	2	7	7	2	7	3	8	4	8	2	6
Student 51	8	2	7	7	7	3	3	3	3	3	3	7	2	2
Student 52	7	4	4	6	2	8	8	9	6	7	7	8	1	7
Student 53	4	5	5	5	6	9	1	5	5	6	7	1	7	7
Student 54	5	5	5	5	7	9	1	5	5	5	1	6	2	6
Student 55	8	7	NC	NC	5	8	5	7	NC	7	7	7	7	7
Student 56	6	5	4	4	5	5	6	5	6	6	5	6	5	5
Student 57	1	1	1	1	5	8	5	6	1	1	7	9	1	8
Student 58	9	1	2	2	6	9	7	8	7	5	4	9	1	8
Student 59	9	NC	6	6	9	9	9	9	6	7	6	9	7	9
Student 60	2	2	2	8	8	8	4	7	5	7	3	5	1	6
Student 61	9	1	1	2	2	9	2	9	1	3	1	6	1	6
Student 62	3	5	8	4	1	7	8	6	5	6	5	8	2	8
Student 63	5	6	9	9	8	9	7	7	5	5	3	7	5	7
Student 64	1	1	1	1	1	6	6	1	1	1	1	1	1	9
Student 65	8	6	6	6	7	8	6	9	7	8	7	8	2	6
Student 66	7	3	4	6	5	7	6	8	7	6	1	6	2	7
Student 67	9	5	9	9	9	9	6	7	6	7	6	9	5	7
Student 68	7	NC	4	4	6	8	5	8	NC	7	Nc	6	4	5
Student 69	9	3	1	6	1	9	7	7	8	6	6	9	6	9
Student 70	9	6	7	7	8	9	9	9	6	8	6	8	7	8
Student 71	1	1	1	1	1	8	1	7	1	1	1	1	1	1
Student 72	2	5	5	9	9	6	1	9	5	5	5	8	5	1
Student 73	7	4	2	5	8	8	7	4	4	6	2	7	4	7
Student 74	6	2	2	2	1	7	7	8	6	7	6	9	8	8
Student 75	7	7	7	7	7	7	8	7	7	7	7	7	7	8
Student 76	8	8	8	8	8	8	8	8	8	8	8	8	8	8
Student 77	7	5	5	5	7	7	7	7	6	6	6	7	5	6
Student 78	5	3	6	7	7	8	8	9	6	8	5	7	2	9
Student 79	8	NC	NC	8	8	8	8	8	6	7	7	8	7	8
Student 80	6	6	6	3	8	8	8	8	9	6	4	8	1	7
Student 81	3	NC	3	3	3	8	7	7	NC	4	NC	3	4	4
Student 82	8	6	4	6	8	8	8	8	8	8	6	8	8	8
Student 83	2	2	2	2	2	8	2	2	2	2	2	2	2	2
Student 84	3	2	2	2	2	8	7	5	NC	2	2	4	2	7
Student 85	6	5	5	6	4	8	7	7	5	6	5	7	5	6
Student 86	9	5	6	4	8	8	9	9	7	4	7	1	6	9
Student 87	2	2	8	4	8	6	8	8	8	3	6	6	6	8
Student 88	8	8	7	6	4	9	7	9	NC	7	7	9	8	8
Student 89	5	5	6	5	7	6	6	8	8	7	6	5	5	8
Student 90	8	6	7	7	8	8	8	8	6	7	6	8	2	6
Student 91	NC	6	6	5	4	8	6	4	7	7	6	5	7	6
Student 92	8	8	7	8	9	9	9	9	8	9	8	9	9	9
Student 93	3	2	2	2	2	6	2	2	2	2	2	2	2	2
Student 94	7	7	NC	7	7	5	5	7	5	7	5	7	5	5
Student 95	1	1	1	1	1	9	1	1	1	1	1	1	1	1
Student 96	4	2	2	2	2	8	7	6	3	5	2	6	2	3
Student 97	9	5	5	5	6	7	6	7	5	6	5	8	5	8
Student 98	1	1	7	7	7	8	1	8	7	7	1	7	1	7
Student 99	7	6	5	5	5	9	9	7	5	7	7	9	5	6
Student 100	7	5	6	6	7	7	6	7	6	6	5	7	5	6
Student 101	5	1	6	8	8	5	8	8	1	7	8	9	9	9
Student 102	8	8	8	1	9	9	8	9	9	9	9	9	9	9
Student 103	9	8	8	6	8	7	3	6	NC	8	8	8	1	9
Student 104	9	5	5	6	7	8	8	8	5	8	5	8	5	8
Student 105	1	1	NC	6	7	7	7	7	8	8	7	7	1	8
Student 106	3	2	2	8	8	8	4	9	6	8	4	8	3	9
Student 107	2	2	2	4	6	7	7	6	5	6	6	6	2	7
Student 108	1	nc	2	2	2	7	7	5	3	4	2	2	2	8
Student 109	2	NC	1	3	3	7	7	7	2	7	2	7	1	7
Student 110	7	5	5	4	7	8	6	7	6	7	2	7	5	6
Student 111	8	5	5	8	8	7	8	7	5	8	5	8	5	8
Student 112	9	9	9	9	9	9	9	9	9	9	9	9	9	9
Student 113	3	2	3	3	3	8	7	5	4	4	3	7	3	7
Student 114	7	NC	NC	5	5	9	7	7	NC	7	NC	5	7	5
Student 115	8	1	1	7	2	7	8	8	6	8	6	8	1	8
Student 116	8	5	6	6	9	9	7	9	8	6	5	9	7	7
Student 117	1	1	1	7	8	9	1	9	1	9	1	7	1	1
Student 118	4	5	6	3	3	9	9	9	3	4	4	9	5	6
Student 119	8	2	2	2	2	7	3	8	3	3	3	6	5	3

## Sheet: Ready Dishes
	Ready Dishes
	Bovine Stew	Bolognese Lasagna	Sauteed Noodles	Potato Puree	Fish Patty	Cod with Cream	Strogonoff of Veal	Almondegas	Roasted Potatoes	French Fries
Student 1	8	9	9	9	5	9	9	9	9	9
Student 2	6	7	8	5	5	6	6	6	7	8
Student 3	8	8	8	8	6	8	8	8	8	9
Student 4	6	8	8	6	6	8	8	8	8	8
Student 5	2	6	7	8	7	8	7	8	7	7
Student 6	2	9	8	8	1	9	9	9	8	8
Student 7	7	9	8	7	1	1	8	9	6	8
Student 8	7	8	7	7	7	7	7	8	8	9
Student 9	2	6	8	6	5	5	2	6	7	9
Student 10	8	9	9	8	1	9	9	9	8	7
Student 11	6	8	3	5	5	8	8	8	7	8
Student 12	6	7	7	8	8	5	6	8	8	7
Student 13	8	8	8	8	4	8	8	8	8	8
Student 14	6	7	8	7	8	9	9	9	9	9
Student 15	7	8	6	2	5	7	7	8	6	8
Student 16	3	9	7	7	1	3	6	7	7	8
Student 17	9	9	9	5	5	9	9	9	9	9
Student 18	3	8	8	9	5	9	9	6	5	9
Student 19	4	7	7	6	4	7	6	7	8	8
Student 20	6	8	7	8	2	2	5	5	7	8
Student 21	8	9	9	7	7	7	8	8	6	8
Student 22	1	7	6	6	4	8	7	5	7	9
Student 23	7	8	8	7	7	8	8	7	7	7
Student 24	7	8	8	6	4	6	7	8	6	8
Student 25	7	9	9	2	6	2	7	8	8	9
Student 26	3	8	8	2	2	7	6	3	7	7
Student 27	4	8	8	6	4	6	7	7	7	7
Student 28	2	9	9	9	1	9	6	8	9	9
Student 29	2	8	7	1	1	8	3	3	6	8
Student 30	5	7	6	6	5	6	5	6	7	7
Student 31	5	8	9	6	5	8	8	8	4	9
Student 32	8	9	8	8	7	9	9	9	8	8
Student 33	7	8	6	4	7	5	7	7	7	8
Student 34	9	9	9	9	9	9	9	9	9	9
Student 35	7	8	7	7	4	8	8	8	5	4
Student 36	6	9	9	9	6	8	9	7	8	9
Student 37	7	9	9	9	7	8	8	9	8	9
Student 38	5	5	5	1	9	5	9	5	1	1
Student 39	8	8	8	9	9	9	9	9	9	2
Student 40	8	8	8	1	5	5	6	6	5	8
Student 41	5	7	7	5	5	8	6	6	6	7
Student 42	7	8	8	7	4	7	6	6	6	7
Student 43	6	8	8	7	6	8	8	8	7	8
Student 44	9	9	9	9	9	9	9	9	9	9
Student 45	9	9	9	4	4	9	8	9	8	8
Student 46	6	4	8	8	6	8	8	6	9	9
Student 47	6	6	8	7	7	6	8	8	8	6
Student 48	6	9	9	9	7	6	NC	4	8	8
Student 49	4	7	7	7	1	6	6	7	4	9
Student 50	6	7	8	5	5	6	6	6	7	8
Student 51	3	3	3	3	4	4	5	5	6	6
Student 52	2	6	7	8	7	8	7	8	7	7
Student 53	8	8	8	8	6	8	8	8	8	9
Student 54	5	9	7	4	1	9	6	7	6	9
Student 55	7	2	2	2	2	8	8	7	8	8
Student 56	7	6	7	5	5	7	7	7	6	5
Student 57	6	9	9	8	6	7	9	9	9	9
Student 58	4	8	8	4	6	9	9	9	9	9
Student 59	7	9	9	4	1	7	9	9	9	7
Student 60	9	9	9	9	9	9	9	9	9	9
Student 61	9	9	9	9	3	9	9	9	9	9
Student 62	6	8	8	7	5	7	7	8	8	7
Student 63	1	9	8	9	3	3	9	9	7	9
Student 64	4	9	9	6	1	6	NC	7	9	9
Student 65	7	8	8	8	4	9	9	9	8	8
Student 66	8	8	8	8	5	8	9	8	8	9
Student 67	6	1	7	8	4	6	6	4	9	9
Student 68	4	4	5	2	4	4	5	6	8	8
Student 69	8	9	9	1	1	7	8	8	9	8
Student 70	8	9	9	9	8	9	9	9	8	9
Student 71	6	7	7	7	7	7	7	6	8	6
Student 72	7	1	9	9	3	1	5	9	9	9
Student 73	7	7	7	7	7	7	7	7	7	7
Student 74	7	8	8	8	2	9	8	1	8	8
Student 75	7	8	7	8	7	8	7	8	7	7
Student 76	8	8	8	8	8	8	8	8	8	8
Student 77	5	9	9	5	5	8	8	8	8	8
Student 78	8	8	8	9	4	9	8	7	9	9
Student 79	NC	NC	8	6	4	8	6	4	7	8
Student 80	5	7	5	7	3	3	3	3	8	8
Student 81	6	7	7	7	4	5	NC	7	6	7
Student 82	8	8	7	6	6	8	8	8	8	8
Student 83	6	8	7	8	8	7	7	8	9	9
Student 84	7	8	8	8	5	8	8	8	7	8
Student 85	7	7	7	7	6	8	8	7	7	8
Student 86	3	9	9	1	1	1	9	9	7	8
Student 87	5	6	7	6	2	6	7	6	7	7
Student 88	7	9	8	9	8	8	8	9	9	9
Student 89	6	8	7	6	5	8	7	7	8	8
Student 90	7	7	8	8	7	7	7	7	8	8
Student 91	5	8	7	6	4	2	2	2	2	2
Student 92	9	9	9	8	7	8	9	9	9	9
Student 93	6	7	7	7	6	7	7	7	6	7
Student 94	NC	8	7	7	7	7	7	7	7	7
Student 95	1	9	4	9	7	7	6	7	8	9
Student 96	7	8	8	4	2	7	8	8	7	8
Student 97	7	7	7	7	6	6	6	7	7	8
Student 98	1	9	9	8	1	8	8	7	6	7
Student 99	9	9	8	8	7	9	9	9	7	9
Student 100	6	7	6	7	4	7	7	7	8	8
Student 101	5	5	5	5	5	4	3	3	5	4
Student 102	6	9	9	7	8	9	9	9	9	9
Student 103	6	6	7	6	6	8	8	8	8	6
Student 104	9	9	9	9	9	9	9	9	9	9
Student 105	3	8	8	6	6	9	7	9	8	8
Student 106	8	2	6	6	8	7	7	7	7	3
Student 107	7	8	7	6	6	8	9	8	7	8
Student 108	7	7	7	7	7	8	8	8	8	7
Student 109	7	7	7	7	2	8	7	7	7	7
Student 110	8	8	8	8	8	8	8	8	8	9
Student 111	8	6	6	7	7	7	8	8	8	7
Student 112	9	9	9	9	9	9	9	9	9	9
Student 113	6	8	8	8	4	8	8	6	8	8
Student 114	8	9	8	7	2	9	9	8	9	9
Student 115	8	8	8	6	6	8	8	8	8	8
Student 116	6	9	9	7	4	1	9	9	8	8
Student 117	9	1	9	9	1	3	9	1	9	9
Student 118	7	8	7	5	5	6	7	8	8	8
Student 119	6	8	7	8	3	3	8	6	7	6

## Sheet: Dessert
	Dessert
	Gelatin	Yogurt	Ice Cream
Student 1	9	9	9
Student 2	8	8	NC
Student 3	9	9	9
Student 4	8	8	8
Student 5	6	6	7
Student 6	7	9	7
Student 7	7	8	8
Student 8	7	8	8
Student 9	6	6	9
Student 10	3	3	9
Student 11	8	7	8
Student 12	6	5	6
Student 13	1	8	8
Student 14	8	8	9
Student 15	5	5	8
Student 16	6	6	8
Student 17	9	9	9
Student 18	8	8	2
Student 19	6	8	9
Student 20	7	5	7
Student 21	8	8	8
Student 22	7	7	7
Student 23	9	8	8
Student 24	8	8	7
Student 25	2	7	8
Student 26	6	6	7
Student 27	8	8	8
Student 28	9	9	7
Student 29	7	7	8
Student 30	6	8	4
Student 31	9	9	8
Student 32	8	8	8
Student 33	5	7	9
Student 34	9	9	9
Student 35	9	7	7
Student 36	9	9	9
Student 37	9	1	7
Student 38	9	9	1
Student 39	9	9	9
Student 40	4	8	8
Student 41	5	6	7
Student 42	8	8	6
Student 43	8	8	7
Student 44	9	9	9
Student 45	8	9	7
Student 46	9	9	9
Student 47	8	9	9
Student 48	7	6	8
Student 49	8	8	8
Student 50	8	8	NC
Student 51	7	7	7
Student 52	6	6	7
Student 53	9	9	9
Student 54	9	6	9
Student 55	8	8	8
Student 56	1	5	5
Student 57	9	9	9
Student 58	8	8	8
Student 59	9	9	9
Student 60	7	8	NC
Student 61	9	9	9
Student 62	3	7	8
Student 63	9	7	9
Student 64	1	8	9
Student 65	6	7	6
Student 66	8	7	8
Student 67	9	9	9
Student 68	3	5	6
Student 69	7	8	8
Student 70	7	8	9
Student 71	6	8	8
Student 72	9	9	9
Student 73	7	7	7
Student 74	6	7	NC
Student 75	8	7	8
Student 76	8	8	8
Student 77	8	8	8
Student 78	8	8	8
Student 79	8	8	8
Student 80	8	8	8
Student 81	7	7	7
Student 82	8	8	6
Student 83	8	8	8
Student 84	5	1	9
Student 85	7	7	7
Student 86	9	2	9
Student 87	6	6	9
Student 88	9	8	8
Student 89	7	6	7
Student 90	8	8	7
Student 91	NC	6	5
Student 92	8	8	8
Student 93	7	7	7
Student 94	7	7	7
Student 95	9	9	9
Student 96	7	6	8
Student 97	7	7	7
Student 98	9	9	9
Student 99	9	9	9
Student 100	8	7	7
Student 101	7	6	4
Student 102	9	9	9
Student 103	1	5	7
Student 104	7	7	9
Student 105	1	9	3
Student 106	8	8	6
Student 107	6	8	8
Student 108	7	8	7
Student 109	7	7	7
Student 110	6	6	6
Student 111	6	8	8
Student 112	9	9	9
Student 113	7	8	7
Student 114	7	9	8
Student 115	7	4	8
Student 116	9	9	9
Student 117	5	9	9
Student 118	7	6	8
Student 119	7	8	6

## Sheet: Beef
	Beef
	Rabbit	Liver	Chorizo	Pork	Duck	Kid	Hamburger	Turkey	Chicken	Veal
Student 1	5	4	7	8	5	8	9	9	9	9
Student 2	6	1	1	7	6	6	7	8	8	7
Student 3	4	1	3	8	5	4	7	7	7	7
Student 4	7	3	4	7	8	7	8	8	8	8
Student 5	1	1	1	7	6	7	7	6	7	7
Student 6	8	1	3R	9	9	9	9	7	9	9
Student 7	7	2	8	8	7	6	8	7	8	9
Student 8	4	2	7	8	7	4	8	8	7	7
Student 9	7	NC	6	6	8	1	6	9	9	2
Student 10	7	1	5	7	8	1	9	9	9	9
Student 11	5	3	8	7	8	5	8	8	8	8
Student 12	6	3	3	6	6	6	6	7	8	8
Student 13	9	NC	6	7	8	8	8	9	9	9
Student 14	9	3	2	9	9	9	9	9	9	9
Student 15	6	4	4	6	8	8	8	7	7	7
Student 16	1	1	5	6	6	1	7	4	7	7
Student 17	9	1	9	9	9	5	9	9	9	9
Student 18	8	6	6	8	8	9	6	7	8	8
Student 19	4	3	2	7	4	4	6	6	6	6
Student 20	5	1	6	7	6	7	6	7	7	7
Student 21	7	2	2	7	8	8	8	8	8	8
Student 22	8	6	5	7	5	7	8	8	8	8
Student 23	4	1	6	8	8	8	8	8	9	8
Student 24	7	2	3	7	6	2	8	6	9	8
Student 25	8	1	1	8	7	9	8	8	8	7
Student 26	6	1	2	6	6	7	6	6	7	7
Student 27	7	7	4	6	8	7	6	7	9	8
Student 28	3	2	1	7	8	8	8	7	9	9
Student 29	6	2	2	2	7	2	5	6	8	4
Student 30	3	1	2	4	4	2	6	6	6	5
Student 31	8	8	8	8	8	8	8	7	8	7
Student 32	8	6	8	8	8	8	8	8	8	8
Student 33	2	2	4	4	4	3	8	8	8	8
Student 34	9	9	9	9	9	9	9	9	9	9
Student 35	1	1	2	4	5	1	8	8	9	9
Student 36	2	1	1	6	9	4	9	9	9	7
Student 37	7	1	1	8	9	7	9	9	9	9
Student 38	9	1	1	1	9	9	1	9	9	9
Student 39	9	9	7	7	9	9	9	9	9	9
Student 40	5	1	6	6	7	8	8	8	8	8
Student 41	6	3	6	6	6	6	7	7	6	7
Student 42	7	3	6	6	6	6	7	8	8	8
Student 43	8	4	2	7	8	8	8	8	8	8
Student 44	9	1	1	6	9	9	9	9	9	9
Student 45	8	NC	9	9	9	6	6	8	8	8
Student 46	5	1	1	7	7	5	6	9	9	9
Student 47	9	3	9	6	9	9	9	9	9	9
Student 48	8	1	4	7	9	9	6	8	9	9
Student 49	3	3	4	5	3	2	7	5	8	8
Student 50	6	1	1	7	6	6	7	8	8	7
Student 51	6	6	5	5	4	5	5	6	6	5
Student 52	1	1	1	7	6	7	7	6	7	7
Student 53	4	1	3	8	5	4	7	7	7	7
Student 54	5	1	3	8	6	4	9	9	9	8
Student 55	7	7	7	7	7	7	2	6	6	5
Student 56	6	5	6	6	6	7	4	7	7	6
Student 57	6	6	7	7	8	7	9	9	9	9
Student 58	9	4	7	9	8	1	9	7	8	9
Student 59	7	9	9	7	6	9	7	9	9	9
Student 60	7	1	6	8	8	8	8	8	8	8
Student 61	7	1	6	6	9	9	9	9	9	9
Student 62	1	2	2	6	8	8	7	7	8	8
Student 63	4	3	1	3	5	3	8	7	7	7
Student 64	1	1	9	9	9	9	9	8	8	9
Student 65	8	1	1	8	8	8	8	8	8	8
Student 66	8	2	3	4	5	8	8	7	8	8
Student 67	8	4	4	4	9	1	1	8	9	2
Student 68	7	NC	NC	7	7	6	8	8	8	8
Student 69	2	8	8	7	1	8	8	9	9	9
Student 70	7	9	7	9	9	9	9	9	9	9
Student 71	7	2	2	6	7	7	7	8	8	8
Student 72	5	1	1	6	3	5	8	8	9	9
Student 73	4	1	5	4	6	6	6	6	6	6
Student 74	8	1	7	8	8	9	8	8	8	9
Student 75	7	7	Nc	8	7	8	7	8	7	8
Student 76	8	8	8	8	8	8	8	8	8	8
Student 77	6	1	6	6	7	7	6	7	7	7
Student 78	9	2	8	8	8	7	8	9	9	8
Student 79	8	4	4	6	8	6	6	8	8	6
Student 80	7	1	1	1	6	6	6	7	7	7
Student 81	7	NC	NC	7	8	8	7	7	7	7
Student 82	8	1	7	6	7	7	8	7	8	8
Student 83	8	2	6	7	7	6	8	8	8	8
Student 84	1	6	7	8	8	8	7	8	8	9
Student 85	7	4	5	7	7	7	7	7	7	7
Student 86	4	1	6	8	7	8	9	7	9	9
Student 87	8	2	2	8	8	8	4	8	8	8
Student 88	9	7	7	9	9	8	9	9	9	8
Student 89	7	2	8	7	7	6	7	8	8	7
Student 90	8	1	2	7	7	9	6	7	8	7
Student 91	6	9	5	6	7	8	4	6	7	6
Student 92	8	NC	5	9	9	9	9	9	9	9
Student 93	6	1	2	7	7	4	7	6	8	7
Student 94	1	1	1	1	1	1	6	1	8	4
Student 95	1	1	1	1	1	1	9	2	8	8
Student 96	7	1	1	7	6	6	8	8	8	7
Student 97	4	4	2	3	6	4	7	7	9	5
Student 98	1	1	5	8	2	4	7	4	9	8
Student 99	8	NC	9	9	9	6	9	6	9	9
Student 100	4	1	2	7	6	4	8	8	8	8
Student 101	1	1	1	5	5	5	5	8	8	5
Student 102	9	1	9	9	9	9	9	9	9	9
Student 103	9	1	1	7	9	9	9	9	9	9
Student 104	8	4	4	8	8	8	8	8	8	8
Student 105	9	1	8	9	9	9	8	8	9	9
Student 106	8	2	4	6	8	4	6	9	9	9
Student 107	7	1	6	6	7	7	7	7	8	7
Student 108	7	4	7	8	7	8	8	7	8	8
Student 109	7	1	7	7	7	7	7	3	7	7
Student 110	7	1	6	8	9	4	8	8	8	8
Student 111	1	1	7	8	7	5	8	8	8	8
Student 112	9	9	9	9	9	9	9	9	9	9
Student 113	8	3	7	7	6	8	7	8	9	8
Student 114	1	7	8	9	8	1	8	8	9	9
Student 115	8	6	8	6	8	8	8	8	8	7
Student 116	8	1	1	7	7	7	9	9	9	9
Student 117	9	1	1	9	9	8	4	9	9	9
Student 118	5	3	4	8	7	7	9	9	9	9
Student 119	7	3	3	3	7	6	4	8	8	8

## Sheet: Cereals
	Cereals
	White Rice	Wheat Bread	Noodles
Student 1	9	9	9
Student 2	8	8	8
Student 3	9	9	9
Student 4	8	8	8
Student 5	7	7	8
Student 6	8	8	9
Student 7	7	8	8
Student 8	7	7	7
Student 9	9	8	8
Student 10	8	8	8
Student 11	7	7	7
Student 12	7	8	7
Student 13	9	9	9
Student 14	9	9	9
Student 15	7	6	6
Student 16	7	4	6
Student 17	9	9	9
Student 18	8	8	8
Student 19	6	8	8
Student 20	6	7	7
Student 21	8	8	8
Student 22	7	8	6
Student 23	9	7	8
Student 24	9	8	8
Student 25	8	8	8
Student 26	7	7	7
Student 27	8	8	8
Student 28	9	8	9
Student 29	6	6	8
Student 30	6	4	6
Student 31	8	8	9
Student 32	8	8	8
Student 33	8	8	8
Student 34	9	9	9
Student 35	8	8	8
Student 36	9	8	9
Student 37	9	8	9
Student 38	9	1	1
Student 39	8	9	9
Student 40	8	6	7
Student 41	7	6	8
Student 42	8	8	8
Student 43	6	6	6
Student 44	9	9	9
Student 45	9	9	9
Student 46	9	9	9
Student 47	9	7	9
Student 48	9	9	9
Student 49	8	8	8
Student 50	8	8	8
Student 51	6	5	5
Student 52	7	7	8
Student 53	9	9	9
Student 54	7	5	7
Student 55	8	8	5
Student 56	6	5	6
Student 57	9	8	9
Student 58	9	8	9
Student 59	9	9	9
Student 60	9	9	9
Student 61	9	8	9
Student 62	8	7	8
Student 63	5	7	9
Student 64	8	9	9
Student 65	8	8	8
Student 66	8	8	8
Student 67	8	8	8
Student 68	7	5	6
Student 69	8	9	9
Student 70	9	9	9
Student 71	8	8	8
Student 72	9	6	9
Student 73	7	7	7
Student 74	8	8	8
Student 75	8	7	8
Student 76	8	8	8
Student 77	8	6	8
Student 78	9	9	9
Student 79
Student 80	8	7	8
Student 81	7	6	6
Student 82	8	8	8
Student 83	7	8	8
Student 84	8	8	8
Student 85	8	7	7
Student 86	9	9	9
Student 87	8	6	7
Student 88	9	9	9
Student 89	7	6	8
Student 90	7	7	8
Student 91	5	7	6
Student 92	9	8	9
Student 93	6	7	8
Student 94	7	7	7
Student 95	7	9	9
Student 96	9	7	9
Student 97	8	8	8
Student 98	9	7	9
Student 99	9	9	9
Student 100	7	7	7
Student 101	5	5	5
Student 102	9	9	9
Student 103	6	9	9
Student 104	9	9	9
Student 105	9	9	9
Student 106	8	8	8
Student 107	6	7	7
Student 108	8	7	8
Student 109	7	7	7
Student 110	8	8	8
Student 111	8	8	7
Student 112	9	9	9
Student 113	8	7	9
Student 114	9	9	9
Student 115	8	8	8
Student 116	9	5	9
Student 117	9	9	9
Student 118	9	6	7
Student 119	8	7	8

## Sheet: Fruits
	Fruits
	Mango	Persimmon	Banana	Pineapple	Grape	Pear	Kiwi	Orange	Apple	Watermelon	Peach
Student 1	9	9	9	9	9	4	5	9	9	9	9
Student 2	8	1	8	7	7	7	7	7	8	8	8
Student 3	9	8	9	9	9	8	9	9	9	9	9
Student 4	7	5	7	7	7	7	7	7	7	8	8
Student 5	9	6	7	3	7	6	6	6	7	6	8
Student 6	4	2	8	2	8	8	1	1	9	4	7
Student 7	1	1	8	1	6	8	1	1	7	7	1
Student 8	4	NC	8	4	6	7	2	7	7	7	3
Student 9	9	7	7	6		7	7	7	6	6	9
Student 10	8	1	8	9	7	9	8	9	8	9	8
Student 11	8	6	1	7	7	2	8	8	7	7	8
Student 12	2	2	5	9	2	6	8	8	8	5	4
Student 13	8	6	7	7	8	4	6	9	6	8	8
Student 14	9	4	9	9	7	9	8	9	9	7	9
Student 15	9	6	7	8	7	7	6	6	7	8	7
Student 16	9	5	6	9	4	3	6	8	7	1	9
Student 17	5	2	7	5	5	5	5	5	5	5	5
Student 18	9	8	9	6	8	7	3	7	7	9	8
Student 19	4	6	7	7	8	5	6	7	6	7	7
Student 20	9	1	2	9	9	7	7	7	7	7	8
Student 21	4	9	9	4	8	8	7	8	8	8	8
Student 22	8	8	9	9	9	9	9	9	7	9	9
Student 23	6	1	9	4	8	9	4	4	9	4	6
Student 24	2	3	8	8	8	8	6	7	8	9	8
Student 25	2	1	7	8	8	8	9	7	7	8	9
Student 26	8	8	8	6	7	7	6	6	7	7	8
Student 27	7	4	9	8	9	7	9	9	8	9	9
Student 28	9	1	9	9	9	6	8	8	9	7	9
Student 29	8	7	8	8	5	4	7	6	9	8	6
Student 30	4	3	8	3	8	3	6	5	8	4	4
Student 31	9	6	7	9	9	9	6	9	8	9	9
Student 32	8	8	9	8	8	7	8	8	8	8	8
Student 33	8	NC	8	8	8	8	8	8	8	8	8
Student 34	9	9	9	9	9	9	9	9	9	9	9
Student 35	9	6	5	7	7	8	8	7	8	8	6
Student 36	9	9	8	2	8	7	6	7	7	9	9
Student 37	1	1	7	7	7	8	8	1	8	1	9
Student 38	9	9	9	9	9	9	9	9	9	9	9
Student 39	2	9	9	9	9	9	9	9	9	9	9
Student 40	9	9	7	8	7	8	8	8	8	8	9
Student 41	9	9	9	9	9	9	9	9	8	9	9
Student 42	6	6	7	8	8	6	4	6	6	5	5
Student 43	3	6	7	8	8	6	8	8	7	8	8
Student 44	9	9	9	9	9	9	9	9	9	9	9
Student 45	9	8	9	8	9	9	7	8	9	7	9
Student 46	4	4	9	9	9	9	9	9	9	4	9
Student 47	6	9	9	9	9	9	9	9	9	9	9
Student 48	8	7	9	8	8	8	8	8	8	7	6
Student 49	8	4	8	8	4	6	6	7	7	8	8
Student 50	8	1	8	7	7	7	7	7	8	8	8
Student 51	5	6	7	7	6	6	6	6	7	7	7
Student 52	9	6	7	3	7	6	6	6	9	6	8
Student 53	9	8	9	9	9	8	9	9	9	9	9
Student 54	9	1	6	7	9	7	6	7	6	9	9
Student 55	8	NC	8	8	5	8	5	5	8	5	5
Student 56	6	1	6	7	6	7	6	7	7	8	8
Student 57	6	6	9	4	8	9	6	7	9	1	9
Student 58	9	6	8	9	9	8	8	9	8	9	9
Student 59	1	9	9	9	9	9	7	8	7	8	4
Student 60	8	1	9	9	9	9	9	9	9	9	4
Student 61	9	4	9	9	9	9	7	8	9	9	9
Student 62	7	7	6	6	8	8	8	6	8	7	8
Student 63	3	5	5	1	8	7	7	6	8	9	9
Student 64	1	1	8	8	1	8	9	8	8	6	7
Student 65	9	9	9	9	9	8	7	8	9	9	9
Student 66	7	5	6	7	6	6	6	6	6	8	9
Student 67	9	1	9	9	9	9	9	9	9	9	9
Student 68	8	3	9	9	4	8	3	7	8	8	4
Student 69	7	5	7	8	6	8	8	2	6	5	8
Student 70	9	9	9	8	9	9	7	7	9	9	7
Student 71	8	7	8	8	8	8	1	8	8	8	8
Student 72	1	5	9	7	5	3	3	7	9	9	8
Student 73	6	7	8	9	8	7	4	7	7	7	7
Student 74	9	9	8	8	9	8	1	8	8	2	9
Student 75	7	8	7	8	7	8	7	8	7	8	7
Student 76	8	8	8	8	8	8	8	8	8	8	8
Student 77	7	7	7	7	7	6	7	6	6	7	7
Student 78	9	9	9	9	9	9	9	9	9	9	9
Student 79	8	8	8	8	8	8	8	8	8	8	8
Student 80	9	2	8	7	8	7	8	8	8	8	8
Student 81	5	4	7	6	3	6	2	6	6	4	3
Student 82	8	3	8	3	8	8	6	8	8	8	8
Student 83	7	2	7	6	8	2	2	8	8	7	7
Student 84	1	1	1	1	1	1	1	1	1	1	1
Student 85	6	6	8	8	7	7	8	8	6	8	7
Student 86	1	2	6	1	9	6	9	9	7	7	1
Student 87	9	4	9	6	6	7	7	7	7	6	8
Student 88	9	9	9	9	9	8	8	8	8	9	9
Student 89	9	6	8	7	6	8	6	7	8	9	8
Student 90	7	3	8	8	8	7	8	8	8	8	8
Student 91	5	7	6	7	6	5	6	5	7	6	5
Student 92	9	9	9	9	8	9	9	9	8	8	9
Student 93	8	8	8	6	8	6	4	7	7	8	7
Student 94	7	NC	7	7	7	7	7	7	7	7	7
Student 95	9	1	7	7	1	8	2	1	8	9	9
Student 96	9	9	9	8	7	8	7	7	7	8	7
Student 97	9	6	7	7	4	7	7	7	5	9	7
Student 98	9	1	3	9	8	7	8	8	7	9	7
Student 99	9	8	9	8	9	9	9	9	9	9	9
Student 100	6	2	6	8	7	6	7	7	7	8	7
Student 101	3	3	3	9	1	9	8	8	9	9	9
Student 102	9	9	9	9	9	9	9	9	9	9	9
Student 103	9	9	9	9	9	9	9	9	7	9	9
Student 104	6	6	1	9	9	9	9	9	9	9	9
Student 105	1	8	8	8	8	8	8	8	8	8	8
Student 106	8	2	8	8	8	8	8	8	8	8	3
Student 107	8	6	8	7	7	7	6	6	6	4	9
Student 108	4	2	7	8	4	8	3	8	8	4	5
Student 109	8	7	4	8	8	7	7	7	8	7	7
Student 110	8	4	8	8	8	8	8	8	8	8	9
Student 111	7	5	8	8	8	8	8	7	8	7	8
Student 112	9	9	9	9	9	9	9	9	9	9	9
Student 113	8	8	6	7	6	7	3	7	7	6	8
Student 114	9	NC	9	9	9	9	9	9	9	NR	9
Student 115	8	8	8	8	8	8	8	8	8	8	8
Student 116	8	5	9	6	5	9	8	5	9	9	7
Student 117	1	1	9	9	9	9	1	7	9	9	9
Student 118	9	4	9	9	5	7	6	8	8	9	8
Student 119	8	7	8	8	8	8	8	8	8	8	8
