# Supplementary material for: Fuzzy Nonbalanced Hedonic Scale (F-NBHS): A New Method for Treatments of Food Preference Data Collected with Hedonic Scales of Points
Source: Hindawi journal article supplement (doi:10.1155/2020/7945906), 2020-02-11
Supplement: f1 [file 7945906.f1.zip › 7945906.f1/Supplementary Material E.xlsx]

## Sheet: Personal Data
N=82	Sex	Age	Country	District
Student 1	2	19	Portugal	Braga
Student 2	1	19	Portugal	Braga
Student 3	2	19	Portugal	Braga
Student 4	2	18	Portugal	Braga
Student 5	1	18	Portugal	Açores
Student 6	2	18	Portugal	Braga
Student 7	2	18	Portugal	Braga
Student 8	1	18	Portugal	Aveiro
Student 9	1	18	Portugal	Braga
Student 10	1	18	Portugal	Braga
Student 11	1	18	Portugal	Braga
Student 12	1	18	Portugal	Braga
Student 13	1	18	Portugal	Braga
Student 14	2	18	Portugal	Braga
Student 15	2	19	Portugal	Braga
Student 16	1	19	Portugal	Braga
Student 17	2	18	Portugal	Braga
Student 18	2	18	Portugal	Braga
Student 19	2	18	Portugal	Bragança
Student 20	2	18	Portugal	Braga
Student 21	2	17	Portugal	Braga
Student 22	2	18	Portugal	Braga
Student 23	1	34	Portugal	Braga
Student 24	1	32	Portugal	Braga
Student 25	2	23	Portugal	Braga
Student 26	2	19	Portugal	Braga
Student 27	2	19	Portugal	Braga
Student 28	2	19	Portugal	Braga
Student 29	2	19	Portugal	Viana do Castelo
Student 30	1	19	Portugal	Braga
Student 31	2	19	Portugal	Braga
Student 32	2	19	Portugal	Braga
Student 33	2	19	Portugal	Braga
Student 34	1	21	Angola	-
Student 35	2	20	Portugal	Porto
Student 36	2	21	Portugal	Porto
Student 37	1	20	Portugal	Braga
Student 38	2	20	Portugal	Viana do Castelo
Student 39	2	21	Portugal	Braga
Student 40	2	20	Portugal	Braga
Student 41	2	20	Portugal	Porto
Student 42	1	21	Portugal	Porto
Student 43	2	20	Venezuela
Student 44	2	19	Portugal	Braga
Student 45	2	20	Portugal	Braga
Student 46	2	20	Portugal	Porto
Student 47	2	20	Portugal	Viana do Castelo
Student 48	2	20	Portugal	Porto
Student 49	1	20	Portugal	Braga
Student 50	1	24	Portugal	Vila Real
Student 51	1	20	Portugal	Braga
Student 52	2	20	Portugal	Porto
Student 53	1	20	Portugal	Braga
Student 54	1	25	Portugal	Braga
Student 55	1	22	Portugal	Braga
Student 56	2	21	Portugal	Braga
Student 57	1	21	Portugal	Braga
Student 58	1	21	Portugal	Braga
Student 59	2	21	Portugal	Braga
Student 60	1	20	Portugal	Porto
Student 61	2	21	Portugal	Porto
Student 62	2	23	Brasil	São Paulo
Student 63	2	20	Portugal	Braga
Student 64	2	21	Portugal	Braga
Student 65	2	21	Portugal	Porto
Student 66	2	21	Portugal	Porto
Student 67	1	21	Portugal	Braga
Student 68	1	21	Portugal	Viana do Castelo
Student 69	2	21	Portugal	Porto
Student 70	2	21	Portugal	Porto
Student 71	1	22	Portugal	Braga
Student 72	1	21	Portugal	Braga
Student 73	2	21	Portugal	Braga
Student 74	2	22	Portugal	Braga
Student 75	2	22	Portugal	Braga
Student 76	1	22	Portugal	Braga
Student 77	1	22	Cabo Verde	Santiago
Student 78	2	22	Portugal	Braga
Student 79	1	22	Portugal	Porto
Student 80	2	22	Portugal	Porto
Student 81	2	23	Portugal	Braga
Student 82	1	22	Portugal	Braga

## Sheet: Sobremesa
N=82	Dessert
	Gelatin		Yogurt		Ice Cream
	1st reap.	Exp. 1	1st reap.	Exp. 1	1st reap.	Exp. 1
Student 1	9	9	9	9	9	9
Student 2	8	8	8	8	8	8
Student 3	7	7	7	9	8	7
Student 4	7	7	8	8	8	8
Student 5	7	7	8	8	8	8
Student 6	6	6	8	6	8	9
Student 7	4	3	3	3	6	9
Student 8	6	8	5	7	7	8
Student 9	1	1	8	8	8	8
Student 10	7	8	9	8	8	9
Student 11	6	5	6	5	8	8
Student 12	5	6	8	6	6	8
Student 13	9	9	9	9	5	9
Student 14	7	8	7	8	1	2
Student 15	6	7	4	5	7	7
Student 16	8	7	8	7	8	7
Student 17	8	8	7	8	8	7
Student 18	2	2	7	7	9	8
Student 19	7	6	7	6	7	7
Student 20	8	8	8	8	8	8
Student 21	8	9	8	9	3	7
Student 22	7	7	7	7	8	8
Student 23	8	8	8	8	8	8
Student 24	9	9	8	7	6	7
Student 25	9	9	5	9	1	1
Student 26	5	9	8	9	8	9
Student 27	8	8	8	8	7	6
Student 28	6	8	7	8	6	7
Student 29	9	8	9	9	9	9
Student 30	7	8	7	8	8	8
Student 31	7	8	8	8	NC	NC
Student 32	8	7	8	7	8	7
Student 33	7	6	6	6	8	7
Student 34	5	8	8	8	5	8
Student 35	9	9	9	9	9	9
Student 36	9	9	9	9	9	9
Student 37	5	9	7	7	9	9
Student 38	1	1	9	8	9	9
Student 39	6	6	7	7	6	6
Student 40	7	8	7	7	8	8
Student 41	8	9	8	9	8	9
Student 42	2	3	4	5	5	6
Student 43	6	7	7	8	7	8
Student 44	7	7	8	8	8	9
Student 45	6	6	7	8	6	8
Student 46	7	9	7	9	7	9
Student 47	7	7	7	7	NC	7
Student 48	5	6	7	7	NC	NC
Student 49	7	8	7	7	7	8
Student 50	8	8	8	8	8	8
Student 51	8	8	8	8	8	8
Student 52	8	8	8	8	7	8
Student 53	8	8	7	8	7	8
Student 54	7	7	7	7	7	7
Student 55	5	5	1	1	8	9
Student 56	9	9	4	2	9	9
Student 57	8	6	8	6	9	9
Student 58	8	7	5	6	8	7
Student 59	8	8	8	8	7	7
Student 60	8	8	7	8	7	8
Student 61	7	7	7	7	7	7
Student 62	7	7	7	7	7	7
Student 63	9	9	9	9	9	9
Student 64	7	7	5	6	8	8
Student 65	7	7	8	7	8	7
Student 66	8	9	8	9	8	9
Student 67	9	9	8	9	7	9
Student 68	8	8	7	7	7	7
Student 69	9	7	3	6	3	4
Student 70	6	7	7	7	7	9
Student 71	6	6	7	8	8	8
Student 72	7	7	7	8	7	7
Student 73	7	7	7	7	7	7
Student 74	7	6	6	6	7	6
Student 75	5	6	8	8	8	8
Student 76	7	7	8	8	7	7
Student 77	4	7	9	9	7	8
Student 78	6	7	5	4	9	8
Student 79	8	9	8	9	7	9
Student 80	5	5	9	9	9	9
Student 81	7	7	7	6	8	8
Student 82	8	7	8	8	7	6

## Sheet: Beef
N=82	Beef
	Rabbit		Liver		Chorizo		Pork		Duck		Kid		Hamburger		Turkey		Chicken		Veal
	1st reap.	Exp. 1	1st reap.	Exp. 1	1st reap.	Exp. 1	1st reap.	Exp. 1	1st reap.	Exp. 1	1st reap.	Exp. 1	1st reap.	Exp. 1	1st reap.	Exp. 1	1st reap.	Exp. 1	1st reap.	Exp. 1
Student 1	3	5	1	4	6	7	9	8	9	5	9	8	9	9	NC	9	9	9	9	9
Student 2	8	7	3	3	5	4	8	7	8	8	8	7	8	8	8	8	8	8	8	8
Student 3	8	8	1	1	NC	3R	9	9	8	9	9	9	8	9	8	7	7	9	8	9
Student 4	7	7	2	2	8	8	8	8	7	7	5	6	8	8	4	7	8	8	8	9
Student 5	5	4	2	2	8	7	8	8	8	7	4	4	8	8	8	8	7	7	8	7
Student 6	4	7	NC	NC	7	6	6	6	7	8	1	1	7	6	8	9	9	9	3	2
Student 7	6	7	5	1	5	5	5	7	7	8	2	1	7	9	7	9	7	9	7	9
Student 8	5	5	2	3	NC	8	8	7	7	8	4	5	8	8	7	8	7	8	8	8
Student 9	8	9	NC	NC	6	6	6	7	8	8	8	8	8	8	8	9	9	9	9	9
Student 10	7	9	3	3	2	2	9	9	7	9	8	9	8	9	8	9	8	9	8	9
Student 11	5	6	3	4	3	4	6	6	8	8	7	8	8	8	7	7	7	7	7	7
Student 12	3	1	1	1	5	5	6	6	7	6	1	1	7	7	4	4	7	7	7	7
Student 13	9	9	1	1	9	9	8	9	9	9	6	5	9	9	7	9	9	9	8	9
Student 14	8	8	4	6	5	6	7	8	8	8	9	9	6	6	9	7	8	8	8	8
Student 15	3	5	2	1	6	6	7	7	6	6	6	7	6	6	6	7	7	7	7	7
Student 16	8	8	5	6	6	5	8	7	5	5	8	7	6	8	7	8	8	8	8	8
Student 17	7	7	1	2	3	3	8	7	6	6	2	2	9	8	5	6	8	9	8	8
Student 18	8	8	1	1	1	1	8	8	7	7	9	9	8	8	9	8	9	8	6	7
Student 19	6	6	1	1	2	2	6	6	7	6	6	7	5	6	7	6	7	7	7	7
Student 20	7	7	6	7	3	4	7	6	8	8	7	7	6	6	7	7	9	9	8	8
Student 21	4	3	2	2	2	1	8	7	8	8	4	8	8	8	7	7	8	9	8	9
Student 22	6	6	2	2	2	2	2	2	7	7	2	2	5	5	6	6	7	8	2	4
Student 23	8	8	7	6	8	8	8	8	8	8	8	8	8	8	8	8	8	8	8	8
Student 24	1	1	1	1	4	2	6	4	6	5	1	1	8	8	6	8	9	9	8	9
Student 25	8	9	1	1	1	1	1	1	8	9	8	9	1	1	9	9	9	9	6	9
Student 26	9	9	2	9	9	7	7	7	9	9	9	9	8	9	9	9	8	9	9	9
Student 27	7	7	2	3	7	6	7	6	7	6	7	6	7	7	8	8	9	8	8	8
Student 28	8	8	3	4	2	2	7	7	8	8	9	8	7	8	9	8	8	8	8	8
Student 29	9	9	1	3	9	9	7	6	9	9	9	9	9	9	9	9	9	9	9	9
Student 30	3	3	1	3	7	4	7	5	3	3	3	2	8	7	3	5	8	8	8	8
Student 31	7	6	1	1	2	1	8	7	7	6	7	6	7	7	8	8	8	8	7	7
Student 32	7	6	2	6	1	5	7	5	9	4	7	5	3	5	9	6	9	6	7	5
Student 33	1	1	1	1	1	1	7	7	7	6	7	7	8	7	7	6	8	7	7	7
Student 34	6	7	6	7	5	7	5	7	6	7	6	7	3	2	6	6	6	6	8	5
Student 35	7	7	9	9	9	9	8	7	7	6	9	9	7	7	9	9	9	9	9	9
Student 36	7	7	1	1	9	6	9	6	9	9	9	9	9	9	9	9	9	9	9	9
Student 37	5	4	1	3	1	1	5	3	5	5	1	3	9	8	5	7	9	7	9	7
Student 38	NC	1	NC	1	9	9	9	9	9	9	9	9	9	9	6	8	9	8	9	9
Student 39	9	8	1	1	2	1	8	8	8	8	8	8	8	8	8	8	8	8	8	8
Student 40	8	8	1	2	2	3	6	4	5	5	8	8	8	8	7	7	7	8	8	8
Student 41	7	8	1	4	8	4	5	4	7	9	2	1	2	1	7	8	7	9	6	2
Student 42	8	7	3	NC	NC	NC	5	7	8	7	5	6	8	8	8	8	8	8	8	8
Student 43	1	2	8	8	8	8	6	7	1	1	8	8	7	8	8	9	8	9	7	9
Student 44	8	7	8	9	6	7	8	9	8	9	8	9	7	9	8	9	8	9	8	9
Student 45	8	7	2	2	3	2	6	6	8	7	8	7	7	7	8	8	8	8	7	8
Student 46	6	5	1	1	NC	1	7	6	1	3	6	5	9	8	7	8	9	9	8	9
Student 47	3	4	2	1	7	5	6	4	7	6	6	6	7	6	6	6	7	6	7	6
Student 48	8	8	1	1	7	7	8	8	7	8	9	9	8	8	8	8	8	8	9	9
Student 49	7	7	7	7	7	Nc	8	8	6	7	8	8	6	7	5	8	7	7	8	8
Student 50	8	8	8	8	8	8	8	8	8	8	8	8	8	8	8	8	8	8	8	8
Student 51	9	9	2	2	6	8	7	8	9	8	7	7	7	8	5	9	8	9	8	8
Student 52	8	8	3	4	1	4	4	6	8	8	NC	6	4	6	8	8	8	8	6	6
Student 53	8	7	2	1	5	1	6	1	8	6	8	6	6	6	8	7	8	7	6	7
Student 54	7	7	NC	NC	6	NC	8	7	9	8	8	8	7	7	8	7	7	7	7	7
Student 55	1	1	6	6	7	7	8	8	8	8	8	8	7	7	7	8	7	8	9	9
Student 56	4	4	1	1	6	6	7	8	7	7	9	8	9	9	7	7	9	9	9	9
Student 57	8	8	3	2	4	2	8	8	8	8	8	8	7	4	8	8	8	8	8	8
Student 58	8	7	1	2	8	8	6	7	7	7	4	6	8	7	2	8	8	8	6	7
Student 59	8	8	2	1	2	2	8	7	7	7	8	9	7	6	8	7	8	8	8	7
Student 60	8	8	NC	NC	5	5	9	9	9	9	9	9	9	9	8	9	9	9	9	9
Student 61	6	6	1	1	2	2	7	7	6	7	6	4	7	7	6	6	8	8	7	7
Student 62	1	1	4	1	6	1	2	1	1	1	1	1	5	6	1	1	6	8	5	4
Student 63	1	1	1	1	1	1	1	1	1	1	1	1	6	9	1	2	8	8	7	8
Student 64	4	7	1	1	2	1	8	7	4	6	4	6	8	8	6	8	9	8	8	7
Student 65	4	4	4	4	4	2	4	3	7	6	4	4	6	7	6	7	8	9	6	5
Student 66	1	1	1	1	6	5	8	8	3	2	6	4	8	7	4	4	8	9	8	8
Student 67	7	8	NC	NC	9	9	9	9	9	9	7	6	9	9	7	6	9	9	9	9
Student 68	6	4	1	1	2	2	7	7	7	6	3	4	8	8	8	8	8	8	6	8
Student 69	1	1	1	1	1	1	4	5	1	5	1	5	1	5	9	8	9	8	3	5
Student 70	8	8	2	4	2	4	8	8	8	8	8	8	7	8	8	8	5	8	8	8
Student 71	6	7	2	1	6	6	6	6	6	7	7	7	7	7	7	7	8	8	7	7
Student 72	7	7	3	4	7	7	8	8	7	7	8	8	8	8	7	7	8	8	8	8
Student 73	7	7	1	1	7	7	7	7	7	7	7	7	7	7	4	3	7	7	7	7
Student 74	7	7	2	1	7	6	9	8	9	9	4	4	9	8	8	8	9	8	9	8
Student 75	1	1	1	1	8	7	8	8	7	7	2	5	8	8	6	8	8	8	8	8
Student 76	7	8	3	3	8	7	8	7	5	6	8	8	7	7	8	8	9	9	8	8
Student 77	1	1	8	7	8	8	9	9	9	8	1	1	9	8	8	8	9	9	9	9
Student 78	9	8	1	6	8	8	5	6	9	8	9	8	8	8	9	8	8	8	8	7
Student 79	6	8	1	1	1	1	7	7	7	7	8	7	9	9	9	9	9	9	9	9
Student 80	9	9	1	1	1	1	9	9	9	9	8	8	4	4	9	9	9	9	9	9
Student 81	4	5	3	3	6	4	8	8	7	7	5	7	7	9	7	9	7	9	7	9
Student 82	8	7	4	3	4	3	4	3	8	7	8	6	9	4	9	8	9	8	9	8

## Sheet: Cereals
N=82	Cereais e Produtos de Cereais
	White Rice		Wheat Bread		Noodles
	1st reap.	Exp. 1	1st reap.	Exp. 1	1st reap.	Exp. 1
Student 1	9	9	9	9	9	9
Student 2	8	8	8	8	8	8
Student 3	8	8	7	8	9	9
Student 4	8	7	8	8	8	8
Student 5	7	7	7	7	7	7
Student 6	9	9	9	8	9	8
Student 7	7	8	6	8	8	8
Student 8	8	7	7	7	8	7
Student 9	9	9	9	9	9	9
Student 10	9	9	9	9	9	9
Student 11	6	7	6	6	6	6
Student 12	8	7	4	4	7	6
Student 13	9	9	9	9	9	9
Student 14	8	8	8	8	5	8
Student 15	7	6	7	7	6	7
Student 16	8	7	8	8	6	6
Student 17	9	9	7	8	8	8
Student 18	8	8	8	8	9	8
Student 19	7	7	8	7	8	7
Student 20	7	8	7	8	7	8
Student 21	7	9	7	8	7	9
Student 22	6	6	6	6	7	8
Student 23	8	8	8	8	8	8
Student 24	7	8	6	8	8	8
Student 25	9	9	1	1	6	1
Student 26	9	8	9	9	9	9
Student 27	8	8	8	8	8	8
Student 28	7	6	7	6	7	6
Student 29	7	9	7	7	9	9
Student 30	9	8	9	8	9	8
Student 31	9	8	9	8	8	8
Student 32	8	6	8	5	9	5
Student 33	7	7	6	7	7	8
Student 34	8	8	8	8	7	5
Student 35	9	9	7	9	9	9
Student 36	9	9	7	8	9	9
Student 37	3	5	7	7	5	9
Student 38	8	8	9	9	9	9
Student 39	8	8	8	8	8	8
Student 40	8	8	8	8	8	8
Student 41	8	8	8	8	8	8
Student 42	7	7	4	5	7	6
Student 43	8	8	9	9	9	9
Student 44	8	9	8	9	9	9
Student 45	8	8	8	8	8	8
Student 46	9	9	5	6	9	9
Student 47	7	7	7	7	7	7
Student 48	8	8	8	8	8	8
Student 49	7	8	6	7	5	8
Student 50	8	8	8	8	8	8
Student 51	7	9	8	9	7	9
Student 52	8	NC	8	NC	8	NC
Student 53	7	8	7	7	7	8
Student 54	7	7	7	6	7	6
Student 55	8	8	7	8	8	8
Student 56	9	9	9	9	9	9
Student 57	8	8	6	6	7	7
Student 58	7	7	8	6	7	8
Student 59	7	7	7	7	8	8
Student 60	9	9	7	8	9	9
Student 61	6	6	7	7	7	8
Student 62	5	7	5	7	5	7
Student 63	7	7	9	9	8	9
Student 64	9	9	5	7	9	9
Student 65	8	8	8	8	7	8
Student 66	8	9	8	7	9	9
Student 67	9	9	9	9	9	9
Student 68	7	7	7	7	7	7
Student 69	1	5	1	5	1	5
Student 70	9	9	9	9	9	9
Student 71	6	6	NR	7	7	7
Student 72	8	8	7	7	8	8
Student 73	7	7	7	7	7	7
Student 74	9	8	9	8	9	8
Student 75	8	8	8	8	7	7
Student 76	9	8	7	7	9	9
Student 77	9	9	9	9	9	9
Student 78	8	8	8	8	7	8
Student 79	9	9	6	5	9	9
Student 80	9	9	9	9	9	9
Student 81	9	9	7	6	6	7
Student 82	8	8	8	7	8	8

## Sheet: Fruits
N=82	Fruits
	Mango		Persimmon		Banana		Pineapple		Grape		Pear		Kiwi		Orange		Apple		Watermelon		Peach	Peach
	1st reap.	Exp. 1	1st reap.	Exp. 1	1st reap.	Exp. 1	1st reap.	Exp. 1	1st reap.	Exp. 1	1st reap.	Exp. 1	1st reap.	Exp. 1	1st reap.	Exp. 1	1st reap.	Exp. 1	1st reap.	Exp. 1	1st reap.	Exp. 1
Student 1	9	9	9	9	9	9	9	9	9	9	6	4	3	5	9	9	9	9	9	9	9	9
Student 2	7	7	5	5	8	7	8	7	8	7	8	7	7	7	8	7	8	8	8	8	8	8
Student 3	5	4	1	2	8	8	4	2	8	8	8	8	2	1	1	1	8	9	4	4	8	7
Student 4	1	1	1	1	8	8	1	1	1	6	8	8	1	1	1	1	8	7	8	7	1	1
Student 5	5	4	NC	NC	8	8	5	4	7	6	7	7	2	2	7	7	7	7	6	7	4	3
Student 6	9	9	6	7	8	7	8	6	7	7	7	7	7	7	7	7	6	6	6	6	9	9
Student 7	8	8	1	1	7	8	9	9	6	7	9	9	7	8	8	9	8	8	8	9	8	8
Student 8	8	8	6	6	1	1	8	7	7	7	2	2	8	8	7	8	7	7	7	7	8	8
Student 9	6	8	6	6	8	7	8	7	8	8	3	4	7	6	9	9	3	6	7	8	6	8
Student 10	9	9	4	4	9	9	9	9	6	7	8	9	6	8	9	9	9	9	7	7	9	9
Student 11	9	9	5	6	7	7	7	8	7	7	7	7	6	6	6	6	6	7	7	8	7	7
Student 12	9	9	6	5	7	6	9	9	5	4	4	3	7	6	7	8	6	7	1	1	8	9
Student 13	5	5	1	2	9	7	5	5	7	5	5	5	5	5	7	5	7	5	6	5	5	5
Student 14	9	9	8	8	8	9	5	6	8	8	7	7	5	3	8	7	8	7	9	9	7	8
Student 15	8	9	1	1	2	2	8	9	8	9	7	7	7	7	6	7	6	7	6	7	7	8
Student 16	8	8	7	8	8	9	8	9	8	9	8	9	8	9	8	9	7	7	8	9	8	9
Student 17	2	2	4	3	8	8	8	8	7	8	8	8	5	6	6	7	7	8	9	9	8	8
Student 18	1	2	2	1	7	7	9	8	9	8	8	8	9	9	6	7	6	7	9	8	9	9
Student 19	7	8	8	8	8	8	8	6	6	7	7	7	6	6	6	6	7	7	8	7	8	8
Student 20	8	7	6	4	9	9	8	8	9	9	7	7	9	9	9	9	8	8	9	9	9	9
Student 21	9	9	2	1	8	9	8	9	8	9	7	6	7	8	7	8	9	9	6	7	7	9
Student 22	8	8	6	7	8	8	8	8	4	5	7	4	7	7	7	6	9	9	9	8	6	6
Student 23	8	8	8	8	8	9	8	8	8	8	7	7	8	8	8	8	8	8	8	8	8	8
Student 24	9	9	5	6	5	5	8	7	8	7	9	8	8	8	7	7	9	8	8	8	7	6
Student 25	9	9	9	9	9	9	9	9	9	9	9	9	9	9	9	9	9	9	9	9	9	9
Student 26	2	2	9	9	9	9	9	9	9	9	9	9	9	9	9	9	9	9	9	9	9	9
Student 27	5	6	6	6	8	7	8	8	7	8	6	6	6	4	6	6	6	6	5	5	6	5
Student 28	1	3	6	6	8	7	9	8	8	8	6	6	8	8	8	8	7	7	8	8	8	8
Student 29	7	6	9	9	9	9	9	9	9	9	9	9	9	9	9	9	9	9	9	9	9	9
Student 30	7	8	5	4	7	8	7	8	5	4	7	6	5	6	7	7	7	7	7	8	7	8
Student 31	8	8	2	1	8	8	7	7	7	7	7	7	7	7	6	7	8	8	8	8	8	8
Student 32	8	5	2	6	8	7	8	7	6	6	8	6	6	6	8	6	8	7	9	7	8	7
Student 33	9	9	7	6	6	7	4	3	8	7	7	6	8	6	7	6	7	9	6	6	8	8
Student 34	8	8	NC	NC	8	8	8	8	5	5	8	8	5	5	5	5	8	8	5	5	5	5
Student 35	4	1	9	9	9	9	9	9	9	9	9	9	6	7	9	8	8	7	8	8	4	4
Student 36	9	9	5	4	9	9	9	9	9	9	9	9	9	7	8	8	9	9	9	9	9	9
Student 37	1	3	7	5	5	5	3	1	9	8	7	7	8	7	7	6	8	8	9	9	7	9
Student 38	4	1	NC	1	8	8	8	8	1	1	8	8	9	9	8	8	8	8	4	6	8	7
Student 39	8	9	8	9	8	9	8	9	8	9	8	8	8	7	8	8	8	9	8	9	8	9
Student 40	6	7	5	5	7	6	8	7	8	6	6	6	7	6	6	6	7	6	7	8	9	9
Student 41	9	9	2	1	8	9	9	9	8	9	8	9	8	9	9	9	9	9	9	9	8	9
Student 42	8	8	2	3	8	9	8	9	3	4	8	8	2	3	5	7	8	8	8	8	4	4
Student 43	6	7	5	5	8	7	8	8	8	6	8	8	8	8	1	2	7	6	1	5	8	8
Student 44	9	9	9	9	8	9	8	8	8	9	8	9	7	7	8	7	8	9	9	9	7	7
Student 45	8	8	7	7	8	8	8	8	8	8	7	8	1	1	8	8	8	8	8	8	8	8
Student 46	1	1	3	5	9	9	9	7	5	5	1	3	1	3	6	7	9	9	9	9	7	8
Student 47	4	6	4	7	7	8	6	9	7	8	7	7	6	4	7	7	7	7	8	7	7	7
Student 48	9	9	9	9	8	8	8	8	9	9	8	8	1	1	8	8	8	8	2	2	8	9
Student 49	6	7	7	8	8	7	7	8	7	7	8	8	6	7	8	8	9	7	8	8	7	7
Student 50	8	8	5	8	8	8	8	8	8	8	8	8	8	8	8	8	8	8	8	8	8	8
Student 51	9	9	8	9	9	9	9	9	9	9	8	9	9	9	9	9	8	9	9	9	9	9
Student 52	8	8	8	8	8	8	8	8	8	8	8	8	8	8	8	8	8	8	8	8	8	8
Student 53	8	9	3	2	8	8	8	7	8	8	8	7	7	8	8	8	8	8	8	8	8	8
Student 54	NC	5	4	4	7	7	7	6	3	3	7	6	1	2	7	6	6	6	4	4	6	3
Student 55	1	1	1	1	1	1	1	1	1	1	1	1	1	1	1	1	1	1	1	1	1	1
Student 56	3	1	5	2	7	6	1	1	9	9	6	6	9	9	9	9	7	7	8	7	3	1
Student 57	9	9	4	4	9	9	6	6	6	6	6	7	8	7	6	7	7	7	6	6	7	8
Student 58	9	9	4	6	8	8	7	7	7	6	9	8	5	6	7	7	9	8	9	9	8	8
Student 59	7	7	6	3	8	8	8	8	8	8	8	7	8	8	8	8	8	8	8	8	8	8
Student 60	9	9	9	9	9	9	9	9	8	8	9	9	9	9	9	9	8	8	8	8	9	9
Student 61	8	8	8	8	8	8	6	6	8	8	7	6	4	4	7	7	7	7	8	8	7	7
Student 62	7	7	4	NC	7	7	7	7	8	7	8	7	8	7	7	7	8	7	7	7	7	7
Student 63	9	9	1	1	9	7	9	7	2	1	9	8	2	2	1	1	9	8	9	9	9	9
Student 64	8	9	9	9	9	9	7	8	5	7	8	8	7	7	8	7	7	7	8	8	9	7
Student 65	9	9	7	6	8	7	8	7	5	4	6	7	7	7	7	7	7	5	9	9	8	7
Student 66	8	9	1	1	8	3	8	9	7	8	8	7	7	8	8	8	8	7	9	9	7	7
Student 67	8	9	8	8	9	9	8	8	9	9	9	9	9	9	9	9	9	9	9	9	8	9
Student 68	7	6	2	2	6	6	7	8	7	7	6	6	7	7	7	7	7	7	7	8	6	7
Student 69	2	3	1	3	3	3	9	9	1	1	9	9	9	8	8	8	8	9	9	9	9	9
Student 70	5	6	5	6	1	1	9	9	7	9	7	9	7	9	9	9	9	9	9	9	7	9
Student 71	8	8	6	6	6	8	6	7	7	7	6	7	6	6	5	6	6	6	3	4	8	9
Student 72	3	4	2	2	8	7	8	8	2	4	8	8	3	3	8	8	7	8	3	4	6	5
Student 73	7	8	7	7	6	4	7	8	7	8	7	7	7	7	7	7	7	8	7	7	7	7
Student 74	6	8	4	4	9	8	8	8	7	8	7	8	7	8	8	8	9	8	8	8	9	9
Student 75	7	7	3	5	8	8	8	8	8	8	8	8	8	8	7	7	8	8	7	7	8	8
Student 76	9	8	9	8	7	6	8	7	7	6	8	7	4	3	8	7	8	7	7	6	8	8
Student 77	9	9	NC	NC	9	9	9	9	9	9	9	9	8	9	9	9	9	9	9	NR	8	9
Student 78	9	8	9	8	9	8	9	8	9	8	8	8	8	8	9	8	9	8	9	8	9	8
Student 79	9	8	4	5	9	9	6	6	4	5	9	9	7	8	7	5	9	9	9	9	7	7
Student 80	1	1	1	1	9	9	9	9	9	9	9	9	1	1	8	7	9	9	9	9	9	9
Student 81	9	9	3	4	8	9	9	9	4	5	8	7	4	6	7	8	7	8	9	9	8	8
Student 82	8	8	7	7	8	8	9	8	7	8	8	8	7	8	8	8	8	8	9	8	6	8
