# Supplementary material for: Fuzzy Nonbalanced Hedonic Scale (F-NBHS): A New Method for Treatments of Food Preference Data Collected with Hedonic Scales of Points
Source: Hindawi journal article supplement (doi:10.1155/2020/7945906), 2020-02-11
Supplement: f1 [file 7945906.f1.zip › 7945906.f1/Supplementary Material F.xlsx]

## Sheet: Personal Data
N=95	Sex	Age	Country	District
Student 1	2	19	Portugal	Braga
Student 2	2	19	Portugal	Braga
Student 3	2	19	Portugal	Braga
Student 4	1	18	Portugal	Açores
Student 5	2	18	Portugal	Braga
Student 6	2	18	Portugal	Braga
Student 7	2	18	Portugal	Viana do Castelo
Student 8	1	18	Portugal	Braga
Student 9	1	18	Portugal	Braga
Student 10	1	18	Portugal	Braga
Student 11	1	18	Portugal	Braga
Student 12	1	18	Portugal	Braga
Student 13	1	18	Portugal	Porto
Student 14	2	19	Portugal	Braga
Student 15	2	18	Portugal	Porto
Student 16	1	19	Portugal	Braga
Student 17	2	18	Portugal	Aveiro
Student 18	2	18	Portugal	Braga
Student 19	2	18	Portugal	Bragança
Student 20	2	18	Portugal	Braga
Student 21	2	18	Portugal	Braga
Student 22	2	18	Portugal	Braga
Student 23	2	19	Brasil	Ceará
Student 24	1	34	Portugal	Braga
Student 25	1	18	Cabo Verde	-
Student 26	2	18	Portugal	Braga
Student 27	1	18	Portugal	Braga
Student 28	1	32	Portugal	Braga
Student 29	2	20	Portugal	Braga
Student 30	2	22	Portugal	Braga
Student 31	2	23	Portugal	Braga
Student 32	2	19	Portugal	Braga
Student 33	2	20	Portugal	Viana do Castelo
Student 34	2	18	Portugal	Braga
Student 35	2	19	Portugal	Braga
Student 36	2	19	Portugal	Braga
Student 37	2	20	Portugal	Braga
Student 38	2	19	Portugal	Viana do Castelo
Student 39	2	19	Portugal	Braga
Student 40	2	19	Portugal	Viana do Castelo
Student 41	2	19	Portugal	Braga
Student 42	1	19	Portugal	Braga
Student 43	1	21	Angola	-
Student 44	1	22	Angola	Luanda
Student 45	1	20	Portugal	Braga
Student 46	2	20	Portugal	Braga
Student 47	2	20	Portugal	Porto
Student 48	2	20	Portugal	Braga
Student 49	2	21	Portugal	Porto
Student 50	2	20	Portugal	Braga
Student 51	1	20	Portugal	Braga
Student 52	2	20	Portugal	Viana do Castelo
Student 53	2	21	Portugal	Braga
Student 54	2	20	Portugal	Braga
Student 55	2	20	Portugal	Porto
Student 56	1	21	Portugal	Porto
Student 57	2	20	Venezuela
Student 58	2	19	Portugal	Braga
Student 59	2	20	Portugal	Braga
Student 60	2	20	Portugal	Porto
Student 61	2	20	Portugal	Viana do Castelo
Student 62	2	20	Portugal	Porto
Student 63	1	20	Portugal	Braga
Student 64	1	24	Portugal	Vila Real
Student 65	2	20	Portugal	Braga
Student 66	1	20	Portugal	Braga
Student 67	2	20	Portugal	Porto
Student 68	1	25	Portugal	Braga
Student 69	2		Portugal	Braga
Student 70	1	21	Portugal	Braga
Student 71	1	22	Portugal	Braga
Student 72	2	22	Portugal	Porto
Student 73	2	21	Portugal	Braga
Student 74	1	21	Portugal	Braga
Student 75	1	21	Portugal	Braga
Student 76	1	21	Portugal	Braga
Student 77	2	21	Portugal	Braga
Student 78	1	21	Portugal	Vila Real
Student 79	1	20	Portugal	Porto
Student 80	2	21	Portugal	Porto
Student 81	2	23	Brasil	São Paulo
Student 82	1	22	Portugal	Porto
Student 83	2	21	Portugal	Viana do Castelo
Student 84	2	21	Portugal	Porto
Student 85	2	22	Portugal	Braga
Student 86	2		Portugal	-
Student 87	1	22	Portugal	Braga
Student 88	1	21	Portugal	Braga
Student 89	2	21	Portugal	Braga
Student 90	2	22	Portugal	Braga
Student 91	2	22	Portugal	Braga
Student 92	1	22	Portugal	Porto
Student 93	1	22	Portugal	Braga
Student 94	1	22	Cabo Verde	Santiago
Student 95	2	22	Portugal	Braga

## Sheet: Legumes
N=95	Legumes
	Friar Beans		Lentils		Black Beans		White Beans		Chickpeas	Chickpeas
	2nd reap.	Exp. 1	2nd reap.	Exp. 1	2nd reap.	Exp. 1	2nd reap.	Exp. 1	2nd reap.	Exp. 1
Student 1	4	5	NC	NC	8	8	4	6	7	4
Student 2	7	7	NC	NC	7	7	1	1	7	6
Student 3	7	7	0	0	7	8	7	8	1	3
Student 4	6	4	3	3	5	5	5	5	3	3
Student 5	6	5	NC	3	8	7	5	6	4	4
Student 6	8	7	8	7	1	1	8	8	8	8
Student 7	7	6	5	4	7	7	7	7	7	7
Student 8	4	5	0	1	4	7	4	6	0	1
Student 9	3	4	3	2	3	3	3	4	6	6
Student 10	7	7	4	4	5	5	6	7	6	5
Student 11	5	6	0	0	6	7	3	0	0	0
Student 12	2	3	NC	3	4	1	2	1	4	1
Student 13	1	2	Nc	3	5	5	6	6	2	3
Student 14	6	5	2	1	3	1	6	4	4	4
Student 15	1	1	1	1	1	1	1	1	1	1
Student 16	4	4	2	2	5	5	3	2	4	3
Student 17	0	0	0	0	4	0	0	0	0	0
Student 18	1	3	0	2	1	2	1	2	0	1
Student 19	6	6	7	6	4	6	6	6	6	6
Student 20	7	6	4	4	7	6	4	3	7	6
Student 21	1	2	1	2	5	4	1	1	1	1
Student 22	7	7	5	NC	7	7	7	7	7	7
Student 23	6	4	0	4	6	5	6	5	0	1
Student 24	6	5	4	4	7	7	6	7	6	7
Student 25	4	6	5	6	6	6	4	6	4	5
Student 26	3	4	2	NC	1	3	1	3	2	4
Student 27	6	8	4	8	8	8	3	8	6	8
Student 28	5	6	0	1	7	4	6	4	7	5
Student 29	8	7	4	1	7	7	6	6	6	5
Student 30	0	0	0	0	0	0	4	0	0	0
Student 31	8	7	8	7	4	4	4	4	8	7
Student 32	8	7	8	7	8	7	8	7	1	1
Student 33	5	4	2	NC	1	6	4	4	2	3
Student 34	4	6	3	4	4	5	4	5	7	7
Student 35	7	7	4	6	8	7	7	7	7	7
Student 36	0	0	6	0	0	0	0	0	0	1
Student 37	8	8	8	8	8	8	8	8	8	8
Student 38	6	6	1	4	8	8	4	4	6	6
Student 39	6	5	4	3	5	4	5	5	0	2
Student 40	8	8	7	8	8	8	7	8	7	8
Student 41	8	7	NC	NC	8	7	8	7	8	7
Student 42	5	3	NC	2	6	7	5	5	1	0
Student 43	5	5	NC	5	5	6	NC	6	5	6
Student 44	5	5	4	3	7	6	6	6	7	5
Student 45	8	8	5	7	8	8	8	7	5	5
Student 46	8	8	4	4	8	8	6	8	8	7
Student 47	7	8	3	0	7	8	6	6	7	7
Student 48	6	7	6	7	6	7	6	7	6	7
Student 49	6	5	4	0	6	5	6	5	6	5
Student 50	6	6	4	3	7	7	5	6	5	6
Student 51	8	4	6	4	1	2	4	4	8	8
Student 52	0	NC	8	NC	8	0	8	NC	8	NC
Student 53	5	6	3	3	7	8	6	7	7	6
Student 54	5	5	4	2	8	7	4	5	8	6
Student 55	6	4	4	2	7	8	6	7	5	5
Student 56	4	3	1	3	4	3	4	3	4	4
Student 57	6	5	0	0	0	1	3	1	0	0
Student 58	7	6	4	4	8	8	5	6	5	6
Student 59	0	0	0	0	0	0	0	0	0	0
Student 60	5	5	6	4	0	0	4	4	4	4
Student 61	6	6	0	6	6	6	5	4	7	7
Student 62	7	7	1	0	7	7	7	7	7	7
Student 63	6	7	6	6	7	6	6	6	7	6
Student 64	8	7	4	7	8	7	8	7	8	7
Student 65	7	6	6	5	7	7	5	3	7	6
Student 66	7	6	7	7	7	6	7	6	4	5
Student 67	6	6	NC	6	6	7	6	6	7	7
Student 68	2	2	NC	NC	2	2	2	2	2	2
Student 69	8	7	2	3	8	7	8	5	8	7
Student 70	1	1	1	1	1	1	1	1	1	1
Student 71	5	5	4	4	6	5	5	5	4	4
Student 72	0	0	NC	4	7	7	6	7	4	5
Student 73	8	8	1	2	7	7	5	4	8	7
Student 74	1	3	0	2	7	7	5	5	0	0
Student 75	7	7	2	4	8	8	6	6	2	3
Student 76	5	6	6	5	7	8	6	7	6	6
Student 77	6	6	5	5	6	6	7	6	6	6
Student 78	3	NC	3	NC	3	NC	3	NC	4	NC
Student 79	8	6	6	6	8	8	8	8	7	7
Student 80	6	5	2	1	3	3	5	3	5	4
Student 81	7	4	5	7	5	6	4	4	5	7
Student 82	3	3	7	7	7	7	4	7	0	0
Student 83	7	7	5	5	7	8	6	5	7	8
Student 84	7	6	4	4	7	7	3	6	3	5
Student 85	7	7	NC	NC	7	7	7	6	7	7
Student 86	7	7	NC	NC	8	7	7	7	8	7
Student 87	5	5	5	5	7	7	6	4	5	6
Student 88	0	1	0	1	0	1	0	1	0	1
Student 89	6	6	NC	nc	6	7	6	6	5	6
Student 90	6	7	1	2	8	8	6	7	8	7
Student 91	5	6	4	4	6	6	4	5	6	6
Student 92	8	8	NC	8	8	8	8	8	8	8
Student 93	1	3	5	5	7	6	4	3	0	1
Student 94	7	7	NC	NC	8	7	7	7	5	7
Student 95	7	7	5	0	7	7	7	7	7	7

## Sheet: Fish
N=95	Fish
	Hake fillets		Shrimp		Sardines		Cod		Tentacles of Pota		Ray		Salmon		Tuna
	2nd reap.	Exp. 1	2nd reap.	Exp. 1	2nd reap.	Exp. 1	2nd reap.	Exp. 1	2nd reap.	Exp. 1	2nd reap.	Exp. 1	2nd reap.	Exp. 1	2nd reap.	Exp. 1
Student 1	4	4	8	8	2	4	6	6	NC	NC	0	NC	6	6	8	6
Student 2	5	5	7	7	8	6	7	7	1	2	4	2	8	8	5	7
Student 3	5	3	1	3	3	2	6	2	6	6	NC	1	8	7	7	7
Student 4	7	7	8	8	7	7	5	5	7	7	3	5	8	7	8	7
Student 5	6	7	7	7	6	5	4	5	5	6	5	2	7	7	1	6
Student 6	8	7	8	7	2	3	3	3	8	7	0	0	4	4	4	5
Student 7	5	7	0	1	4	4	7	7	4	1	7	7	8	7	5	7
Student 8	8	7	8	7	7	7	7	7	7	7	NC	NC	8	7	7	7
Student 9	7	6	1	2	6	5	7	7	1	0	2	0	8	8	7	7
Student 10	5	6	7	7	5	5	6	6	5	5	3	NC	4	6	3	5
Student 11	6	6	0	2	0	0	0	1	0	0	3	0	7	7	4	4
Student 12	8	8	8	8	8	8	8	8	8	8	5	3	8	8	8	8
Student 13	6	5	7	6	5	3	6	6	4	2	2	2	5	6	3	4
Student 14	5	5	8	7	4	4	7	6	3	1	2	1	5	3	4	5
Student 15	6	7	6	7	7	7	6	6	4	5	4	5	7	8	7	8
Student 16	8	7	8	8	2	3	6	7	8	7	8	7	8	7	1	3
Student 17	6	6	6	6	2	3	7	7	8	7	4	4	6	7	1	4
Student 18	7	6	6	7	3	5	5	5	3	4	4	4	1	0	4	6
Student 19	4	6	5	5	4	3	6	5	3	3	0	0	8	8	5	5
Student 20	5	5	6	6	6	3	5	5	7	7	1	2	7	6	7	7
Student 21	7	7	5	7	4	5	6	6	1	1	1	0	8	8	7	8
Student 22	6	5	8	7	6	5	8	7	6	6	2	3	8	7	8	7
Student 23	1	1	0	1	6	2	6	5	4	2	4	2	7	7	6	6
Student 24	7	6	6	6	7	6	7	7	7	7	7	8	7	7	4	7
Student 25	7	7	5	5	4	6	3	3	2	2	2	2	4	6	8	7
Student 26	6	6	7	8	6	5	7	7	3	NC	4	5	8	8	0	1
Student 27	3	8	0	8	8	8	6	8	7	8	3	8	3	3	6	8
Student 28	5	7	8	8	5	5	7	7	4	4	NR	6	7	7	7	7
Student 29	7	5	8	8	5	5	6	6	7	7	0	NC	5	6	5	7
Student 30	7	6	8	8	4	6	6	6	7	7	0	0	8	7	7	7
Student 31	8	8	8	8	6	4	8	8	0	0	0	0	8	8	8	8
Student 32	7	7	6	8	8	7	8	7	7	7	7	5	8	8	8	8
Student 33	6	4	7	6	6	4	5	5	0	NC	4	4	8	6	6	6
Student 34	6	6	5	5	2	2	7	7	3	3	4	4	7	5	5	6
Student 35	7	7	7	7	7	7	5	6	7	7	4	4	7	7	1	7
Student 36	5	5	7	7	7	7	8	8	4	0	8	7	8	7	NC	5
Student 37	8	8	8	8	8	8	6	8	1	0	1	0	8	8	8	8
Student 38	8	7	6	6	8	8	8	7	8	7	4	4	4	4	5	7
Student 39	8	8	0	0	8	7	7	5	0	0	4	0	8	7	7	8
Student 40	6	7	6	7	0	3	7	8	8	8	3	3	8	8	6	8
Student 41	8	7	8	8	1	5	2	3	4	4	3	1	6	6	NC	7
Student 42	0	7	0	2	0	2	0	3	0	1	0	0	0	1	0	1
Student 43	4	6	5	6	4	6	6	7	4	6	4	4	7	7	5	5
Student 44	6	NR	0	NR	6	5	7	6	0	1	6	5	5	4	5	5
Student 45	8	7	8	8	7	7	5	6	8	6	4	4	6	5	8	7
Student 46	7	7	8	7	2	2	5	5	0	1	0	1	7	7	4	7
Student 47	6	5	8	8	6	5	8	7	6	6	0	0	7	7	5	7
Student 48	7	7	8	8	8	7	7	7	7	7	5	5	8	8	7	8
Student 49	8	8	6	7	5	3	8	8	6	5	4	1	2	1	7	8
Student 50	7	7	7	7	7	7	4	6	1	1	3	2	4	3	7	7
Student 51	4	4	8	8	6	2	6	4	0	1	1	1	4	4	6	6
Student 52	0	0	5	5	0	0	3	5	0	NC	6	5	5	5	0	0
Student 53	7	8	8	8	3	4	7	8	7	7	3	5	3	5	3	5
Student 54	5	5	8	7	3	2	6	5	5	6	4	3	4	4	4	3
Student 55	4	4	8	8	0	0	8	8	0	0	2	0	6	4	7	8
Student 56	6	5	6	5	3	3	6	6	1	0	4	NC	6	6	7	6
Student 57	8	8	8	8	6	6	8	7	8	8	4	0	8	8	0	8
Student 58	8	8	8	8	7	6	8	8	7	7	4	NC	8	8	8	8
Student 59	5	6	0	0	0	0	7	7	0	0	0	0	7	7	6	7
Student 60	8	7	0	0	0	0	4	3	7	6	0	0	7	6	NC	8
Student 61	7	6	7	7	6	5	7	6	7	6	3	1	7	5	1	6
Student 62	6	7	8	8	5	6	8	8	5	6	5	6	7	8	5	8
Student 63	6	7	8	6	6	6	5	6	6	6	3	6	7	6	4	6
Student 64	8	7	8	7	0	5	8	7	5	7	7	7	8	7	7	7
Student 65	7	6	8	7	7	6	8	6	7	6	6	6	7	6	5	5
Student 66	8	6	8	7	8	7	6	5	1	2	4	2	8	8	3	8
Student 67	5	6	7	6	6	6	7	7	8	7	NC	NC	7	7	7	7
Student 68	6	5	4	5	5	6	5	6	NC	NC	NC	NC	5	5	5	6
Student 69	8	6	8	7	8	6	8	7	6	5	0	3	8	7	3	6
Student 70	6	6	8	8	5	6	6	6	6	6	5	5	6	5	7	7
Student 71	7	7	6	6	7	7	7	6	6	5	7	7	7	8	7	7
Student 72	6	6	6	6	7	6	8	7	6	7	5	4	6	4	4	3
Student 73	7	7	8	7	1	0	3	2	4	3	1	3	8	8	5	8
Student 74	6	5	8	8	7	5	5	5	2	2	3	1	7	7	7	7
Student 75	7	7	7	7	7	7	7	7	6	7	6	6	6	6	7	7
Student 76	5	5	2	4	4	4	7	6	4	4	2	2	7	8	6	6
Student 77	7	6	7	7	6	5	7	6	7	6	NC	5	6	6	6	6
Student 78	6	2	6	7	7	6	7	5	1	6	2	5	5	6	6	2
Student 79	5	6	2	2	7	7	6	7	8	8	8	8	7	8	7	8
Student 80	7	6	8	7	7	6	6	6	3	3	NC	3	7	6	6	6
Student 81	5	7	5	5	4	6	5	6	NC	3	NC	NC	7	7	5	6
Student 82	7	8	8	8	8	8	8	8	8	8	7	8	4	8	7	8
Student 83	7	8	7	8	7	7	7	8	7	8	4	NC	7	8	7	8
Student 84	8	8	8	8	7	8	7	8	7	7	4	4	7	8	5	8
Student 85	7	6	8	8	8	7	7	8	8	8	7	7	7	6	NC	6
Student 86	7	5	7	6	6	6	6	5	5	5	5	3	8	7	7	7
Student 87	5	5	3	3	5	5	6	6	2	2	4	3	7	7	1	1
Student 88	7	6	7	7	7	7	7	7	6	7	5	4	8	7	2	3
Student 89	7	7	7	7	6	6	5	6	2	0	3	0	7	7	6	7
Student 90	8	7	8	8	5	6	8	8	2	5	1	2	8	8	5	7
Student 91	7	7	7	7	6	5	6	7	5	5	4	4	8	7	6	7
Student 92	8	8	8	8	7	8	8	8	5	8	4	8	7	8	6	8
Student 93	7	7	0	1	2	2	8	6	7	6	1	2	7	6	6	6
Student 94	0	0	8	6	5	6	8	7	1	2	0	0	7	7	7	7
Student 95	5	5	8	8	8	7	8	7	8	7	5	4	3	4	3	5

## Sheet: Vegetables
N=95	Vegetables
	Cucumber		Radish		Asparagus		Cauliflower		Broccoli		Potato		Onion		Carrot		Watercress		Kale		Eggplant		Tomato		Beetroot		Pepper
	2nd reap.	Exp. 1	2nd reap.	Exp. 1	2nd reap.	Exp. 1	2nd reap.	Exp. 1	2nd reap.	Exp. 1	2nd reap.	Exp. 1	2nd reap.	Exp. 1	2nd reap.	Exp. 1	2nd reap.	Exp. 1	2nd reap.	Exp. 1	2nd reap.	Exp. 1	2nd reap.	Exp. 1	2nd reap.	Exp. 1	2nd reap.	Exp. 1
Student 1	4	6	NC	NC	5	8	0	4	1	2	6	7	5	8	7	8	NC	NC	0	6	4	NC	4	7	NC	NC	7	6
Student 2	7	6	4	1	4	2	1	1	7	6	7	6	1	1	7	6	5	2	7	7	4	3	7	7	4	1	5	5
Student 3	6	6	2	1	0	1	0	0	0	0	6	7	4	4	6	6	3	2	0	2	1	0	6	7	1	1	2	1
Student 4	0	1	NC	4	2	3	1	2	0	1	7	6	0	1	3	3	NC	NC	1	2	0	2	0	0	0	NC	1	2
Student 5	0	0	NC	0	3	6	1	0	2	0	7	7	0	0	1	1	NC	8	2	4	NC	0	6	6	0	0	0	0
Student 6	0	0	0	0	1	0	7	6	4	6	7	6	2	0	7	7	5	6	7	7	7	6	0	0	0	0	5	7
Student 7	0	1	4	3	7	4	8	7	8	7	5	6	5	5	8	8	4	5	7	6	4	4	4	6	4	4	4	4
Student 8	8	8	4	1	6	6	6	6	7	7	5	5	5	6	8	7	4	5	6	6	5	3	7	6	4	1	7	6
Student 9	0	2	NC	2	2	2	3	2	3	2	7	8	0	0	6	4	2	2	3	4	2	2	0	2	2	22	2	2
Student 10	3	5	NC	NC	1	NC	2	5	2	3	6	6	3	5	5	5	NC	NC	2	3	NC	NC	5	6	NC	NC	5	5
Student 11	7	6	0	4	7	7	7	7	7	7	5	5	2	3	5	5	4	4	4	3	5	5	4	4	5	5	0	3
Student 12	4	4	NC	NC	0	2	1	2	1	2	6	6	8	8	6	4	NC	NC	0	1	NC	Nc	5	4	1	4	7	4
Student 13	6	5	3	3	3	3	6	3	3	2	5	6	5	5	7	6	NC	5	6	5	3	3	5	6	3	3	3	2
Student 14	7	5	4	3	8	7	6	7	6	7	7	7	6	5	6	6	NC	3	6	7	6	5	8	7	4	1	7	6
Student 15	1	1	1	1	1	1	1	1	1	1	4	2	1	1	4	2	2	1	1	1	1	1	1	1	1	1	1	1
Student 16	7	6	4	4	4	4	4	4	6	5	6	6	6	6	7	6	4	3	4	3	4	2	1	0	4	4	5	6
Student 17	6	NR	2	1	6	5	2	3	1	2	6	6	7	6	6	6	5	6	6	6	1	3	4	1	1	0	7	6
Student 18	3	1	4	3	4	3	4	3	3	3	7	7	5	5	7	7	2	4	5	5	4	3	0	4	4	3	3	2
Student 19	6	6	4	5	5	5	5	6	6	6	6	6	4	4	5	5	5	5	5	5	4	5	6	6	5	4	5	5
Student 20	7	7	4	4	4	4	6	6	5	6	5	3	5	6	7	7	4	4	6	5	4	4	8	8	4	4	7	7
Student 21	0	3	4	2	0	2	0	2	1	6	8	8	7	6	8	8	4	6	0	3	1	3	8	8	1	2	5	2
Student 22	6	7	NC	NC	NC	NC	5	5	8	7	6	6	5	5	8	7	6	NC	7	5	6	6	8	7	6	NC	5	6
Student 23	4	3	1	3	4	3	7	5	6	5	7	7	7	7	7	7	NC	3	7	7	7	7	3	3	4	4	7	5
Student 24	5	5	4	5	7	6	6	6	6	6	6	7	6	5	8	8	4	6	6	7	3	5	5	5	3	5	5	6
Student 25	7	6	4	5	4	4	3	4	4	4	7	6	4	5	4	4	4	4	5	7	4	4	5	6	4	4	5	5
Student 26	8	7	4	2	3	5	4	5	5	6	6	7	6	7	7	7	NC	4	5	7	3	3	7	7	2	3	7	7
Student 27	7	8	0	2	0	2	0	2	0	2	6	2	0	2	0	2	0	2	6	2	0	2	6	2	0	3	7	3
Student 28	Nc	5	0	1	0	1	6	4	5	3	5	6	8	8	8	7	4	1	6	5	0	0	7	7	0	0	8	8
Student 29	5	5	NC	NC	6	5	3	1	5	5	6	6	6	6	6	6	1	4	6	6	NC	NC	6	6	NC	NC	6	5
Student 30	0	0	0	0	0	0	5	0	0	0	8	8	0	0	4	5	NC	0	5	0	0	0	0	0	0	0	0	0
Student 31	8	8	6	8	8	8	8	8	8	8	8	8	8	8	8	8	8	8	8	8	8	8	7	8	8	8	6	8
Student 32	8	8	6	8	8	8	8	8	8	8	8	8	8	8	8	8	7	8	8	8	8	8	8	8	8	7	8	8
Student 33	3	3	4	NC	4	NC	2	4	1	4	5	5	7	7	7	7	4	4	4	5	4	4	8	7	4	NC	8	7
Student 34	5	4	4	4	8	6	5	4	5	4	6	6	4	4	6	5	1	2	7	6	3	3	7	6	0	0	5	4
Student 35	4	3	NC	3	7	7	6	6	6	6	7	6	6	6	6	6	7	6	6	6	4	4	1	1	6	6	7	8
Student 36	0	0	NC	2	2	NC	4	NC	3	2	6	6	5	5	8	7	NC	NC	4	5	4	3	7	7	4	6	0	0
Student 37	8	8	4	0	4	4	4	0	5	5	6	8	8	8	8	8	4	8	4	3	5	8	8	8	5	8	8	8
Student 38	3	4	4	NC	4	4	7	4	7	7	8	6	7	7	8	8	6	8	8	8	7	5	8	8	7	7	7	7
Student 39	0	0	0	4	0	0	5	5	5	5	8	8	6	7	7	7	4	4	7	7	5	6	0	0	0	0	0	0
Student 40	0	5	5	5	NC	7	7	7	8	8	6	7	8	8	8	8	7	8	8	8	7	8	8	8	8	8	8	8
Student 41	5	6	NC	6	NC	4	5	3	5	1	7	7	3	3	7	7	4	5	3	4	7	6	7	8	7	6	5	6
Student 42	4	6	2	3	1	1	1	1	0	1	8	7	6	6	4	5	NC	1	2	1	NC	1	5	5	NC	1	7	6
Student 43	7	7	4	6	4	NC	4	NC	4	4	6	7	4	4	6	6	NC	NC	4	6	6	6	5	6	6	6	4	6
Student 44	4	5	1	4	4	3	5	3	4	4	5	4	4	5	7	4	NC	5	5	5	5	4	4	5	3	4	1	4
Student 45	0	0	3	0	1	0	1	0	4	4	8	7	4	4	5	5	7	0	1	0	6	6	8	8	NR	0	6	7
Student 46	8	8	4	0	3	1	4	1	5	5	8	8	5	6	7	7	4	6	3	4	6	3	8	8	0	0	8	7
Student 47	8	8	NC	NC	6	5	7	5	8	8	7	8	8	8	8	8	5	5	7	6	5	5	8	8	7	6	8	8
Student 48	1	1	3	1	5	1	7	7	7	7	7	7	3	3	7	6	1	4	7	6	6	2	6	4	6	0	6	5
Student 49	6	8	1	0	1	0	8	1	1	1	7	8	1	1	8	8	4	0	3	2	0	0	5	5	0	0	3	5
Student 50	1	2	NC	4	7	7	5	3	1	0	6	6	6	7	5	5	NC	4	5	5	NC	4	7	7	1	1	7	7
Student 51	3	4	4	5	4	8	6	8	8	7	8	8	8	6	7	6	NC	4	6	4	6	2	6	6	6	4	6	6
Student 52	0	0	0	0	0	0	0	0	0	0	6	5	6	5	3	0	NC	0	0	0	0	0	0	0	0	0	8	8
Student 53	7	7	1	5	3	5	7	5	7	6	7	7	5	5	7	8	5	6	7	7	5	6	7	7	1	1	1	5
Student 54	8	6	2	2	5	3	7	5	5	4	6	6	5	5	7	7	6	6	7	5	0	0	5	5	1	1	7	6
Student 55	8	8	4	4	7	8	6	8	8	8	7	8	5	5	7	6	7	5	7	6	6	5	8	8	6	4	6	6
Student 56	6	6	NC	NC	4	3	5	3	5	5	7	7	5	4	7	7	NC	NC	6	6	4	Nc	6	5	3	3	2	4
Student 57	8	8	NC	2	0	0	5	5	0	0	7	8	5	6	8	6	6	7	5	5	7	5	8	8	4	5	8	8
Student 58	8	8	4	5	7	6	7	6	7	7	7	8	7	8	8	8	6	5	5	7	6	5	7	7	6	6	7	7
Student 59	0	0	0	0	0	0	0	0	0	0	7	7	0	0	6	6	0	0	0	0	0	0	0	0	0	0	0	0
Student 60	0	1	NC	4	5	4	8	8	8	8	5	5	0	0	8	8	NC	4	4	4	5	4	8	7	NC	4	0	0
Student 61	7	6	NC	3	2	1	1	4	8	7	5	7	5	6	1	3	4	3	5	5	0	1	7	6	1	3	7	6
Student 62	5	5	NC	1	NC	1	4	1	0	0	6	6	5	6	7	7	4	5	6	6	3	5	8	8	7	7	7	7
Student 63	2	6	6	6	6	6	6	6	8	6	7	6	2	7	6	6	6	6	7	6	3	6	7	6	3	6	2	7
Student 64	8	7	3	7	0	7	7	7	7	7	7	7	1	7	7	7	5	7	7	7	0	7	6	7	3	7	0	7
Student 65	7	6	3	4	4	4	4	4	6	6	6	6	6	6	7	6	5	5	5	5	6	5	6	6	4	4	6	5
Student 66	1	4	NC	2	4	5	7	6	7	6	6	7	7	7	7	8	NC	5	7	7	4	4	5	6	1	1	7	8
Student 67	7	7	NC	NC	NC	NC	6	7	7	7	6	7	5	7	7	7	7	5	6	6	6	6	7	7	6	6	7	7
Student 68	3	2	NC	NC	NC	2	2	2	2	2	6	7	4	6	5	6	NC	NC	3	3	NC	NC	2	2	NC	3	2	3
Student 69	8	7	6	5	5	3	6	5	8	7	8	7	8	7	8	7	8	7	8	7	8	5	8	7	8	7	8	7
Student 70	1	1	1	1	1	1	1	1	1	1	7	7	1	1	1	1	1	1	1	1	1	1	2	1	1	1	1	1
Student 71	2	2	1	1	1	1	2	1	1	1	7	7	7	6	4	4	NC	NC	2	1	1	1	3	3	1	1	6	6
Student 72	6	5	4	4	4	4	5	5	1	3	7	7	6	6	6	6	NC	4	5	5	3	4	6	6	3	4	6	5
Student 73	7	8	4	4	5	5	1	3	7	7	8	7	7	8	7	8	6	6	2	3	7	6	0	0	7	5	8	8
Student 74	0	1	5	1	8	7	5	3	7	7	5	5	8	7	8	7	6	7	5	2	5	5	5	5	5	5	8	7
Student 75	7	7	7	7	6	6	5	5	3	3	7	9	6	6	8	8	NC	NC	5	6	4	6	7	8	6	7	7	7
Student 76	5	4	5	4	7	5	6	4	6	6	4	5	3	5	8	7	4	7	7	6	4	5	5	4	4	4	7	7
Student 77	7	7	4	5	7	6	6	6	7	7	7	7	7	7	7	7	5	5	7	6	6	5	7	7	3	1	7	5
Student 78	3	NC	2	5	2	5	6	4	2	3	5	7	6	5	6	3	1	6	6	6	3	5	6	4	2	6	2	5
Student 79	8	7	6	7	5	6	6	7	8	8	8	8	8	8	8	8	7	7	7	8	6	7	8	8	8	8	8	8
Student 80	1	2	1	1	1	1	1	1	1	1	6	5	1	1	1	1	3	1	1	1	2	1	1	1	1	1	3	1
Student 81	4	6	4	6	NC	NC	6	6	7	6	5	4	4	4	6	6	7	4	6	6	6	4	4	6	5	4	3	4
Student 82	7	7	8	7	8	7	0	0	7	8	8	8	7	7	7	8	7	8	8	8	8	8	8	8	7	8	8	8
Student 83	7	8	7	7	7	7	3	5	7	7	5	6	1	2	3	5	NC	NC	7	7	7	7	7	7	2	0	7	8
Student 84	8	8	4	4	4	4	6	5	6	6	7	7	7	7	6	7	4	4	7	7	4	4	8	7	4	4	8	7
Student 85	0	0	NC	0	NC	NC	7	5	6	6	7	6	5	6	6	6	7	7	6	7	5	6	6	6	0	0	7	7
Student 86	1	2	NC	1	NC	1	6	7	6	7	7	7	5	3	7	8	5	5	6	7	5	3	7	7	5	2	7	8
Student 87	1	1	1	1	1	1	4	3	6	5	6	6	6	6	4	5	3	4	5	5	5	5	5	5	1	1	7	6
Student 88	0	0	NC	nc	2	1	2	1	1	1	7	6	6	6	1	4	NC	2	2	3	1	1	0	1	0	1	8	7
Student 89	3	1	NC	NC	3	0	5	2	3	2	6	6	6	6	6	6	1	1	6	6	0	1	7	6	0	0	6	6
Student 90	5	6	2	4	3	4	1	3	5	6	8	7	1	5	5	6	4	5	5	6	1	1	7	6	1	4	4	5
Student 91	7	7	4	4	4	4	7	7	7	7	6	6	6	7	6	6	4	4	7	7	4	4	7	7	3	4	7	7
Student 92	7	8	8	8	8	8	8	8	8	8	6	8	8	8	8	8	7	8	7	8	7	8	8	8	6	8	8	8
Student 93	3	2	1	1	6	2	2	2	0	2	7	7	7	6	4	4	0	3	0	3	1	2	7	6	0	2	7	6
Student 94	4	6	NC	NC	NC	NC	5	4	3	4	8	8	4	6	4	6	NC	NC	5	6	NC	NC	4	4	4	6	4	4
Student 95	8	7	4	0	4	0	5	6	3	1	8	6	8	7	8	7	3	5	8	7	4	5	8	7	6	0	7	7

## Sheet: Ready Dishes
N=95	Ready Dishes
	Bovine Stew		Bolognese Lasagna		Sauteed Noodles		Potato Puree		Fish Patty		Cod with Cream		Strogonoff of Veal		Almondegas		Roasted Potatoes		French Fries
	2nd reap.	Exp. 1	2nd reap.	Exp. 1	2nd reap.	Exp. 1	2nd reap.	Exp. 1	2nd reap.	Exp. 1	2nd reap.	Exp. 1	2nd reap.	Exp. 1	2nd reap.	Exp. 1	2nd reap.	Exp. 1	2nd reap.	Exp. 1
Student 1	6	7	8	8	2	8	6	8	2	4	8	8	4	8	8	8	8	8	8	8
Student 2	7	5	7	6	8	7	4	4	4	4	5	5	5	5	6	5	8	6	8	7
Student 3	3	1	8	8	7	7	7	7	0	0	8	8	7	8	7	8	7	7	5	7
Student 4	5	6	7	7	5	6	6	6	6	6	7	6	6	6	7	7	7	7	8	8
Student 5	0	1	6	5	7	7	1	5	3	4	1	4	1	1	2	5	7	6	8	8
Student 6	8	7	7	8	5	8	8	7	0	0	8	8	7	8	6	8	6	7	4	6
Student 7	5	5	7	6	7	6	8	7	7	7	4	4	7	5	6	7	6	7	4	6
Student 8	6	7	7	7	8	7	6	7	5	3	7	7	8	7	8	7	8	7	6	7
Student 9	5	5	6	6	7	7	8	6	8	7	8	8	8	8	6	8	8	8	8	8
Student 10	5	6	7	7	5	5	0	1	4	4	5	6	5	6	7	7	5	5	7	7
Student 11	4	2	8	8	7	6	6	6	0	0	0	2	5	5	6	6	7	6	7	7
Student 12	6	8	8	8	8	8	2	4	7	4	8	8	8	8	8	8	8	8	8	8
Student 13	5	3	6	6	6	6	7	5	5	3	6	6	6	5	6	6	8	7	7	7
Student 14	5	5	8	7	7	6	8	7	1	1	2	1	4	4	5	4	6	6	8	7
Student 15	7	7	8	8	8	8	6	6	7	6	7	6	6	7	7	7	5	5	7	7
Student 16	0	0	5	6	5	5	6	5	2	3	7	7	6	6	0	4	5	6	7	8
Student 17	7	6	7	7	7	7	6	6	6	6	7	7	6	7	6	6	6	6	6	6
Student 18	4	6	7	7	7	7	4	5	5	3	6	5	6	6	7	7	6	5	7	7
Student 19	1	2	7	7	7	7	1	1	1	1	6	6	4	5	2	2	6	6	6	6
Student 20	3	3	7	7	7	7	3	5	4	3	6	5	5	6	6	6	6	6	6	6
Student 21	5	1	8	8	1	8	7	8	1	0	8	8	6	5	8	7	7	8	8	8
Student 22	1	1	7	7	NR	6	0	0	1	0	8	7	1	2	3	2	5	5	7	7
Student 23	6	4	6	6	6	5	7	5	4	4	6	5	4	4	6	5	6	6	6	6
Student 24	7	7	7	8	6	7	7	7	5	6	7	8	6	8	6	8	7	7	6	7
Student 25	5	6	8	7	6	5	3	3	7	6	4	4	7	6	5	6	7	6	8	7
Student 26	3	4	7	7	8	8	5	5	5	4	7	7	6	7	7	7	5	3	8	8
Student 27	7	8	7	8	7	8	7	8	3	8	7	8	7	8	7	8	7	8	7	8
Student 28	7	6	7	7	7	6	6	6	2	3	7	7	6	7	6	7	5	4	4	3
Student 29	7	5	8	8	8	8	8	8	8	5	8	7	6	8	8	6	8	7	8	8
Student 30	8	6	8	8	8	8	8	8	5	6	8	7	8	7	8	8	5	7	8	8
Student 31	5	4	0	4	5	4	0	0	5	8	4	4	5	8	4	4	1	0	0	0
Student 32	8	7	8	7	8	7	8	8	8	8	8	8	8	8	7	8	8	8	3	1
Student 33	6	7	7	7	7	7	0	0	7	4	4	4	7	5	7	5	5	4	6	7
Student 34	4	4	8	6	7	6	4	4	4	4	8	7	6	5	5	5	6	5	8	6
Student 35	5	6	7	7	7	7	5	6	2	3	6	6	3	5	5	5	5	5	5	6
Student 36	4	5	8	7	6	7	5	6	5	5	8	7	8	7	7	7	7	6	7	7
Student 37	8	8	8	8	8	8	8	8	8	8	8	8	8	8	8	8	8	8	8	8
Student 38	7	8	8	8	6	8	1	3	1	3	8	8	4	7	8	8	4	7	4	7
Student 39	5	5	1	3	8	7	7	7	5	5	7	7	5	7	4	5	8	8	8	8
Student 40	6	5	6	5	8	7	6	6	6	6	7	5	8	7	7	7	7	7	6	5
Student 41	2	5	7	8	7	8	6	8	4	6	4	5	NC	NC	4	3	6	7	6	7
Student 42	0	3	8	6	7	6	3	6	0	0	1	5	7	5	8	6	2	3	8	8
Student 43	1	6	1	1	1	1	6	1	6	1	7	7	1	7	5	6	4	7	7	7
Student 44	7	6	0	5	5	6	0	4	3	4	7	6	6	6	6	6	7	5	6	4
Student 45	6	5	8	8	8	8	6	7	5	5	6	6	8	8	8	8	8	8	8	8
Student 46	1	3	8	7	8	7	1	3	5	5	8	8	7	8	8	8	8	8	8	8
Student 47	4	6	8	8	8	8	5	3	0	0	6	6	8	8	8	8	7	8	5	6
Student 48	7	8	7	8	7	8	7	8	7	8	7	8	7	8	7	8	7	8	7	8
Student 49	8	8	8	8	8	8	8	8	3	2	8	8	6	8	8	8	8	8	8	8
Student 50	5	5	7	7	7	7	6	6	6	4	6	6	6	6	7	7	7	7	6	6
Student 51	0	0	8	8	6	7	8	8	2	2	6	2	4	8	8	8	8	6	8	8
Student 52	0	3	8	8	8	8	6	5	0	0	6	5	NC	NC	7	6	7	8	8	8
Student 53	5	6	7	7	7	7	7	7	0	3	7	8	7	8	7	8	7	7	7	7
Student 54	8	7	8	7	8	7	8	7	3	4	8	7	8	8	8	7	7	7	8	8
Student 55	5	5	0	0	8	6	8	7	4	3	8	5	8	5	4	3	8	8	8	8
Student 56	2	3	3	3	4	4	2	1	2	3	4	3	4	4	5	5	7	7	7	7
Student 57	8	7	8	8	8	8	0	0	0	0	8	6	8	7	8	7	8	8	8	7
Student 58	6	7	8	8	8	8	8	8	5	7	8	8	8	8	6	8	8	7	8	8
Student 59	6	5	6	6	5	6	8	6	5	6	6	6	6	6	5	5	7	7	6	5
Student 60	8	6	0	0	8	8	8	8	NC	2	0	0	NC	4	8	8	8	8	8	8
Student 61	6	6	6	6	6	6	6.2	6	7	6	7	6	5	6	5	6	6	6	6	6
Student 62	7	6	8	7	8	7	7	7	2	1	8	8	8	7	0	0	8	7	8	7
Student 63	8	6	7	7	8	6	2	7	2	6	3	7	8	6	6	7	7	6	6	6
Student 64	8	7	8	7	8	7	6	7	4	7	8	7	8	7	8	7	8	7	8	7
Student 65	3	4	8	8	6	8	5	4	5	4	8	7	5	7	8	7	8	7	8	7
Student 66	7	7	7	7	7	7	7	8	4	3	7	8	7	7	5	6	7	8	7	8
Student 67	1	NC	3	NC	6	7	1	5	NC	3	6	7	1	5	0	3	5	6	6	7
Student 68	NC	5	6	6	6	6	6	6	3	3	6	4	NC	NC	6	6	6	5	6	6
Student 69	8	7	8	7	8	6	6	5	3	5	8	7	6	7	8	7	8	7	7	7
Student 70	5	5	7	7	7	6	7	7	6	7	7	6	7	6	7	7	7	8	7	8
Student 71	6	6	8	7	8	7	7	7	5	4	6	7	7	7	6	7	5	6	7	7
Student 72	6	6	6	6	6	6	6	6	5	5	6	7	6	7	5	6	6	6	6	7
Student 73	0	2	8	8	8	8	0	0	0	0	1	0	7	8	8	8	7	6	7	7
Student 74	3	4	4	5	6	6	4	5	1	1	4	5	1	6	4	5	7	6	6	6
Student 75	6	6	7	8	7	7	7	8	6	7	6	7	6	7	7	8	7	8	7	8
Student 76	6	5	8	7	7	6	6	5	4	4	6	7	6	6	6	6	8	7	7	7
Student 77	7	6	5	6	7	7	6	7	5	6	6	6	5	6	5	6	7	7	7	7
Student 78	5	4	7	7	7	6	5	5	4	3	6	1	4	1	6	1	6	1	6	1
Student 79	8	8	8	8	7	8	5	7	5	6	7	7	8	8	8	8	8	8	7	8
Student 80	5	5	7	6	6	6	7	6	6	5	6	6	6	6	6	6	5	5	6	6
Student 81	NC	NC	7	7	4	6	4	6	4	6	4	6	4	6	4	6	4	6	4	6
Student 82	8	5	8	8	7	8	7	6	7	7	8	8	8	8	8	8	7	8	7	8
Student 83	3	5	1	5	6	6	3	5	1	5	6	7	7	7	7	7	6	7	1	5
Student 84	8	8	7	8	7	8	8	8	7	8	8	8	7	8	8	8	7	8	7	8
Student 85	0	2	8	7	8	7	5	5	NC	5	8	8	7	6	7	8	7	7	7	7
Student 86	7	7	1	1	4	5	3	5	4	7	6	6	5	6	6	6	4	6	4	2
Student 87	5	6	6	7	6	6	5	5	6	5	7	7	8	8	7	7	7	6	7	7
Student 88	5	6	7	6	7	6	6	6	5	6	7	7	7	7	7	7	7	7	6	6
Student 89	4	6	6	6	6	6	6	6	2	1	7	7	6	6	6	6	6	6	6	6
Student 90	5	7	6	7	7	7	5	7	5	7	8	7	8	7	8	7	8	7	8	8
Student 91	6	7	5	5	4	5	6	6	3	6	4	6	7	7	7	7	7	7	5	6
Student 92	8	8	8	8	7	8	8	8	7	8	8	8	8	8	8	8	8	8	8	8
Student 93	6	5	7	7	8	7	6	7	3	3	8	7	7	7	7	5	7	7	7	7
Student 94	5	7	8	8	7	7	4	6	6	1	8	8	7	8	7	7	8	8	8	8
Student 95	8	7	8	7	8	7	6	5	8	5	8	7	8	7	8	7	8	7	8	7
